# Supplementary material for: Synthesis and self-assembly of 1-deoxyglucose derivatives as low molecular weight organogelators
Source: PubMed Central journal article supplement (PMC3062983; doi:10.3762/bjoc.7.31), 2011-02-21
Supplement: Beilstein_J_Org_Chem-07-234-s002.pdf [file Beilstein_J_Org_Chem-07-234-s002.pdf]

# Supporting Information

for

## Synthesis and self-assembly of 1-deoxyglucose derivatives as low molecular weight organogelators

Guijun Wang\*<sup>1</sup>, Hao Yang<sup>1</sup>, Sherwin Cheuk<sup>1</sup> and Sherman Coleman<sup>2</sup>

Address: <sup>1</sup>Department of Chemistry, University of New Orleans, New Orleans, LA 70148, Phone:  
504 280-1258, Fax: 504 280-6860 and <sup>2</sup>Dillard University, 2601 Gentilly Boulevard, New Orleans,  
Louisiana 70122

Email: Guijun Wang - gwang2@uno.edu

\*Corresponding author

### <sup>1</sup>H and <sup>13</sup>C NMR spectra of compounds 9A–18C

|                                                                             |    |
|-----------------------------------------------------------------------------|----|
| Table of contents.....                                                      | S1 |
| <sup>1</sup> H and <sup>13</sup> C NMR spectra of compound <b>9A</b> .....  | S3 |
| <sup>1</sup> H and <sup>13</sup> C NMR spectra of compound <b>9B</b> .....  | S4 |
| <sup>1</sup> H and <sup>13</sup> C NMR spectra of compound <b>9C</b> .....  | S5 |
| <sup>1</sup> H and <sup>13</sup> C NMR spectra of compound <b>10A</b> ..... | S6 |
| <sup>1</sup> H and <sup>13</sup> C NMR spectra of compound <b>10B</b> ..... | S7 |

|                                                                           |     |
|---------------------------------------------------------------------------|-----|
| $^1\text{H}$ and $^{13}\text{C}$ NMR spectra of compound <b>10C</b> ..... | S8  |
| $^1\text{H}$ and $^{13}\text{C}$ NMR spectra of compound <b>11A</b> ..... | S9  |
| $^1\text{H}$ and $^{13}\text{C}$ NMR spectra of compound <b>11B</b> ..... | S10 |
| $^1\text{H}$ and $^{13}\text{C}$ NMR spectra of compound <b>11C</b> ..... | S11 |
| $^1\text{H}$ and $^{13}\text{C}$ NMR spectra of compound <b>12A</b> ..... | S12 |
| $^1\text{H}$ and $^{13}\text{C}$ NMR spectra of compound <b>12B</b> ..... | S13 |
| $^1\text{H}$ and $^{13}\text{C}$ NMR spectra of compound <b>12C</b> ..... | S14 |
| $^1\text{H}$ and $^{13}\text{C}$ NMR spectra of compound <b>13A</b> ..... | S15 |
| $^1\text{H}$ and $^{13}\text{C}$ NMR spectra of compound <b>13B</b> ..... | S16 |
| $^1\text{H}$ and $^{13}\text{C}$ NMR spectra of compound <b>13C</b> ..... | S17 |
| $^1\text{H}$ and $^{13}\text{C}$ NMR spectra of compound <b>14A</b> ..... | S18 |
| $^1\text{H}$ and $^{13}\text{C}$ NMR spectra of compound <b>14B</b> ..... | S19 |
| $^1\text{H}$ and $^{13}\text{C}$ NMR spectra of compound <b>14C</b> ..... | S20 |
| $^1\text{H}$ and $^{13}\text{C}$ NMR spectra of compound <b>15A</b> ..... | S21 |
| $^1\text{H}$ and $^{13}\text{C}$ NMR spectra of compound <b>15B</b> ..... | S22 |
| $^1\text{H}$ and $^{13}\text{C}$ NMR spectra of compound <b>15C</b> ..... | S23 |
| $^1\text{H}$ and $^{13}\text{C}$ NMR spectra of compound <b>16A</b> ..... | S24 |
| $^1\text{H}$ and $^{13}\text{C}$ NMR spectra of compound <b>16B</b> ..... | S25 |
| $^1\text{H}$ and $^{13}\text{C}$ NMR spectra of compound <b>17A</b> ..... | S26 |
| $^1\text{H}$ and $^{13}\text{C}$ NMR spectra of compound <b>17B</b> ..... | S27 |
| $^1\text{H}$ and $^{13}\text{C}$ NMR spectra of compound <b>17C</b> ..... | S28 |
| $^1\text{H}$ and $^{13}\text{C}$ NMR spectra of compound <b>18A</b> ..... | S29 |
| $^1\text{H}$ and $^{13}\text{C}$ NMR spectra of compound <b>18B</b> ..... | S30 |
| $^1\text{H}$ and $^{13}\text{C}$ NMR spectra of compound <b>18C</b> ..... | S31 |

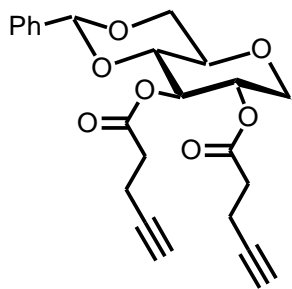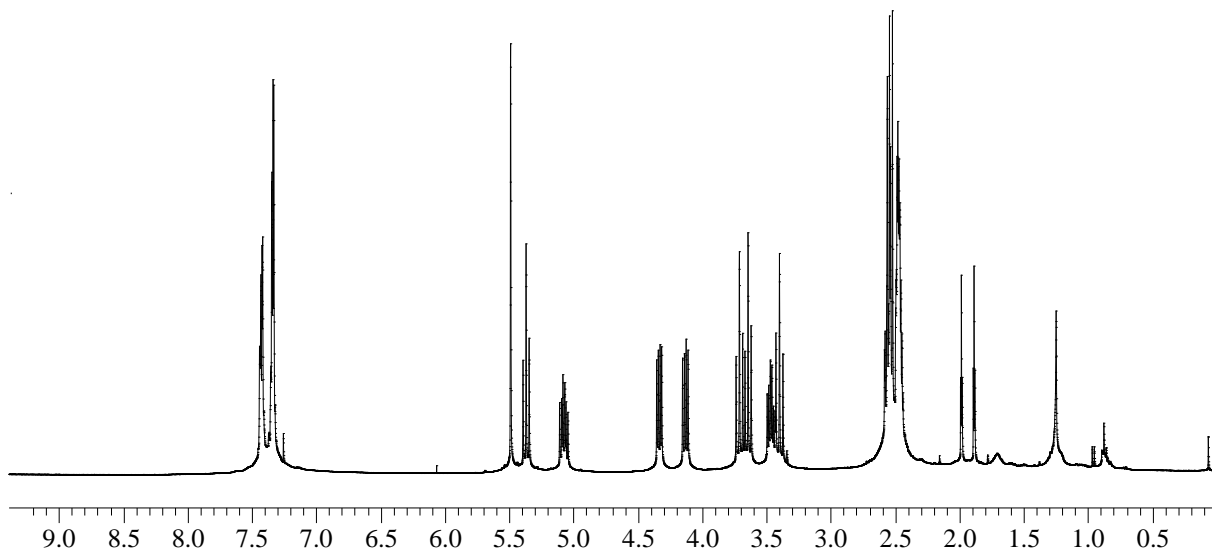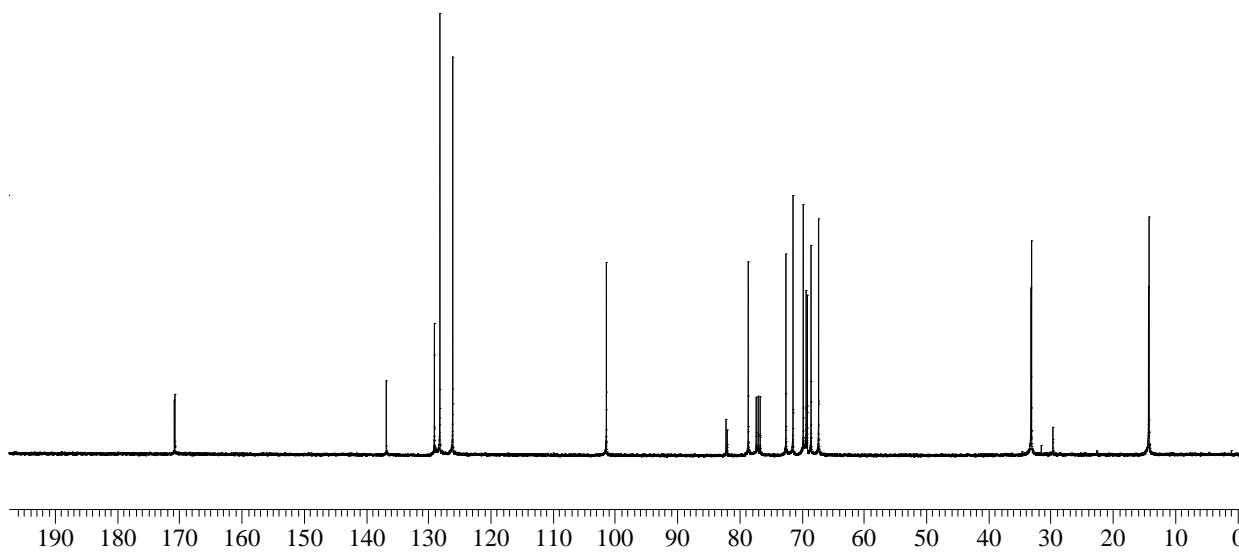

$^1\text{H}$  NMR (400 MHz,  $\text{CDCl}_3$ ) and  $^{13}\text{C}$  NMR (100 MHz,  $\text{CDCl}_3$ ) spectra of compound 9A.

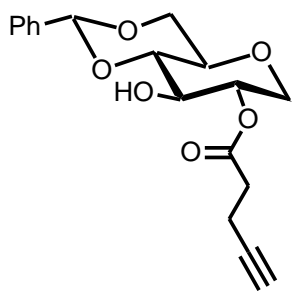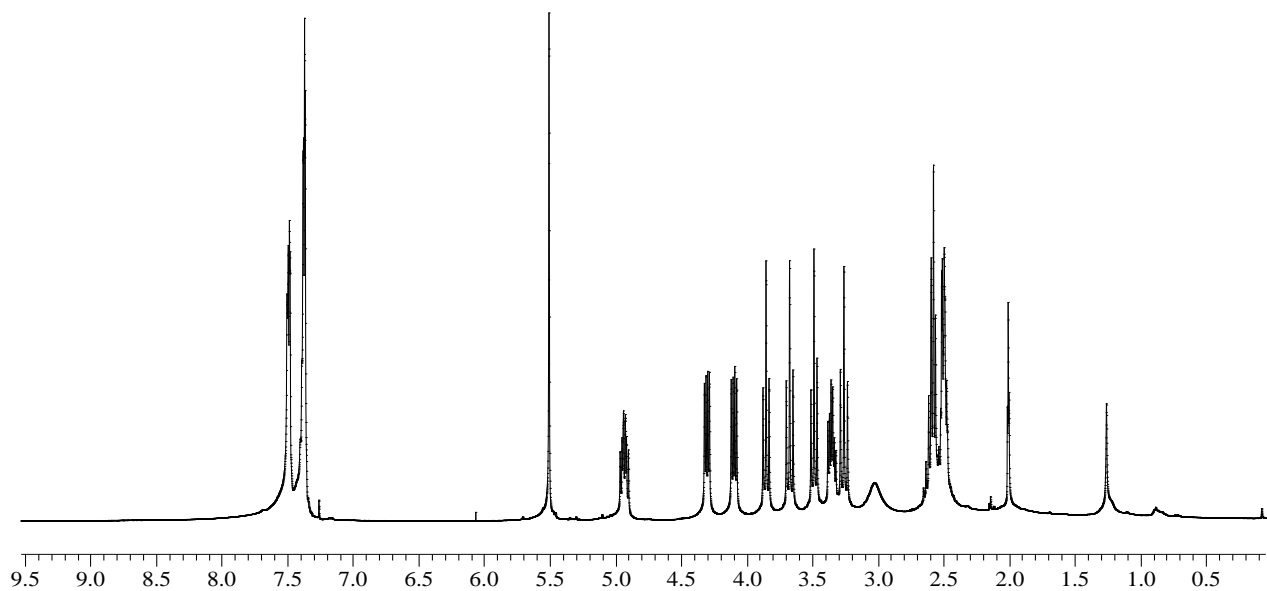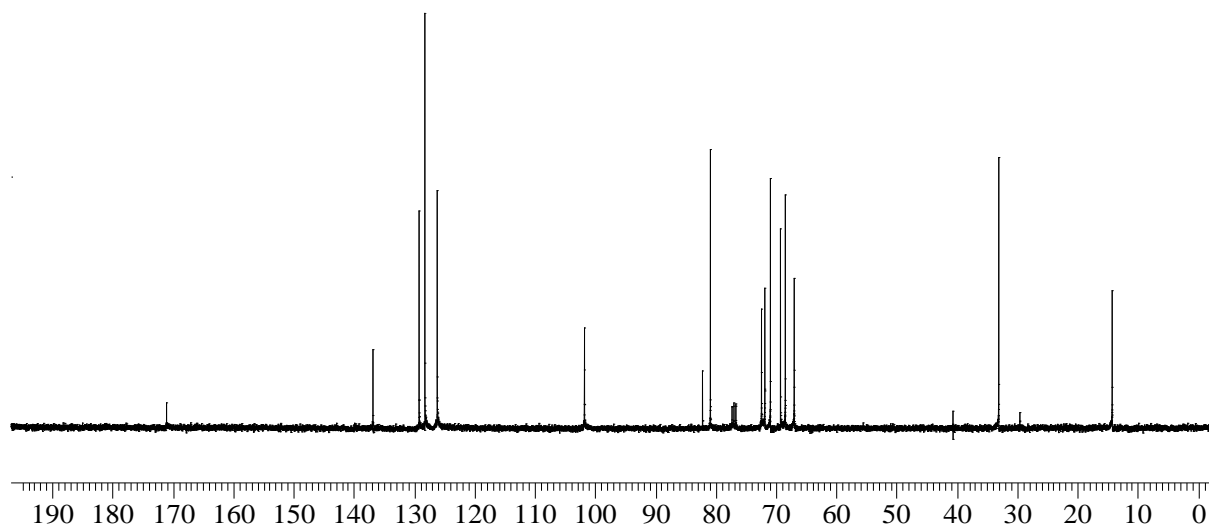

<sup>1</sup>H NMR (400 MHz, CDCl<sub>3</sub>) and <sup>13</sup>C NMR (100 MHz, CDCl<sub>3</sub>) spectra of compound **9B**.

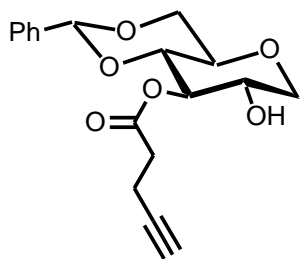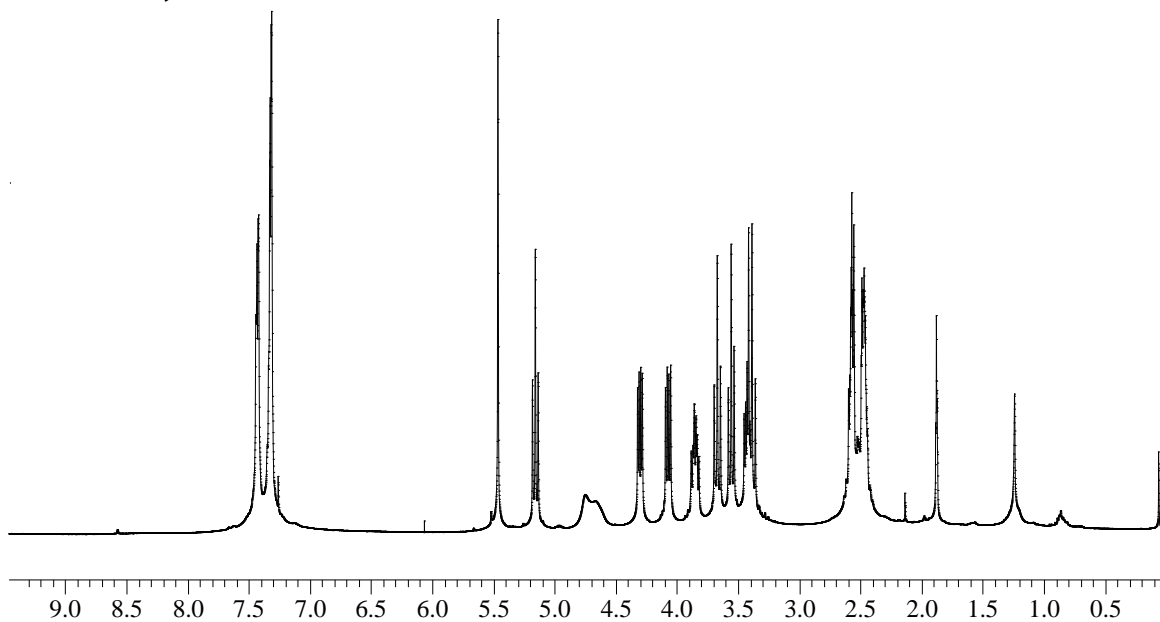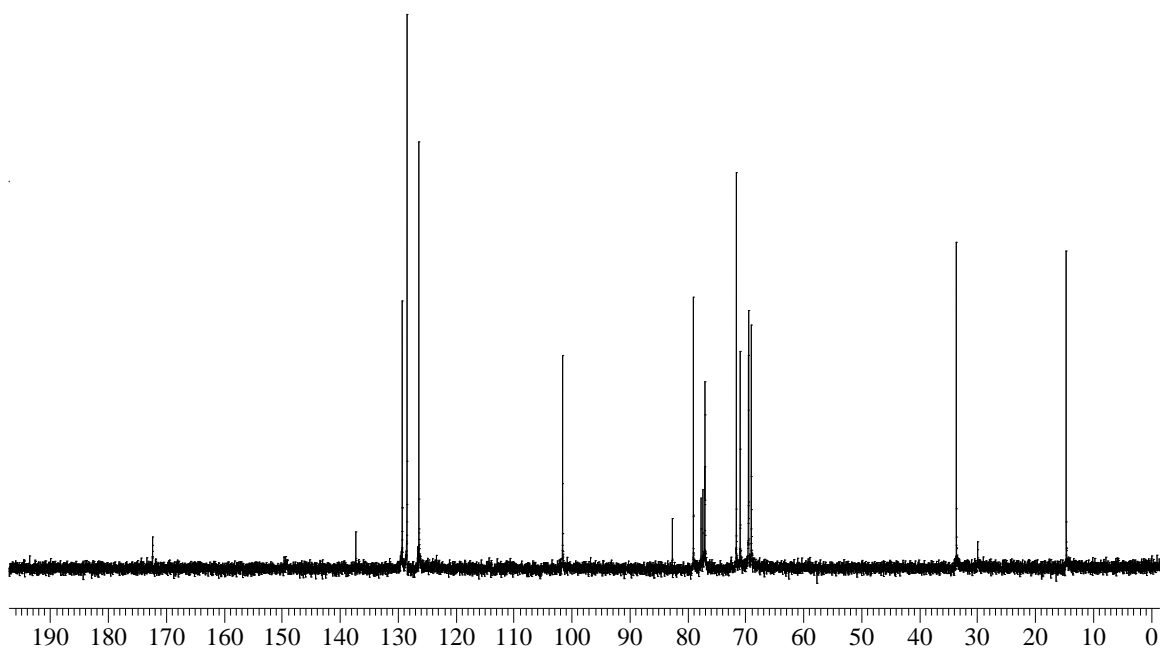

<sup>1</sup>H NMR (400 MHz, CDCl<sub>3</sub>) and <sup>13</sup>C NMR (100 MHz, CDCl<sub>3</sub>) spectra of compound 9C.

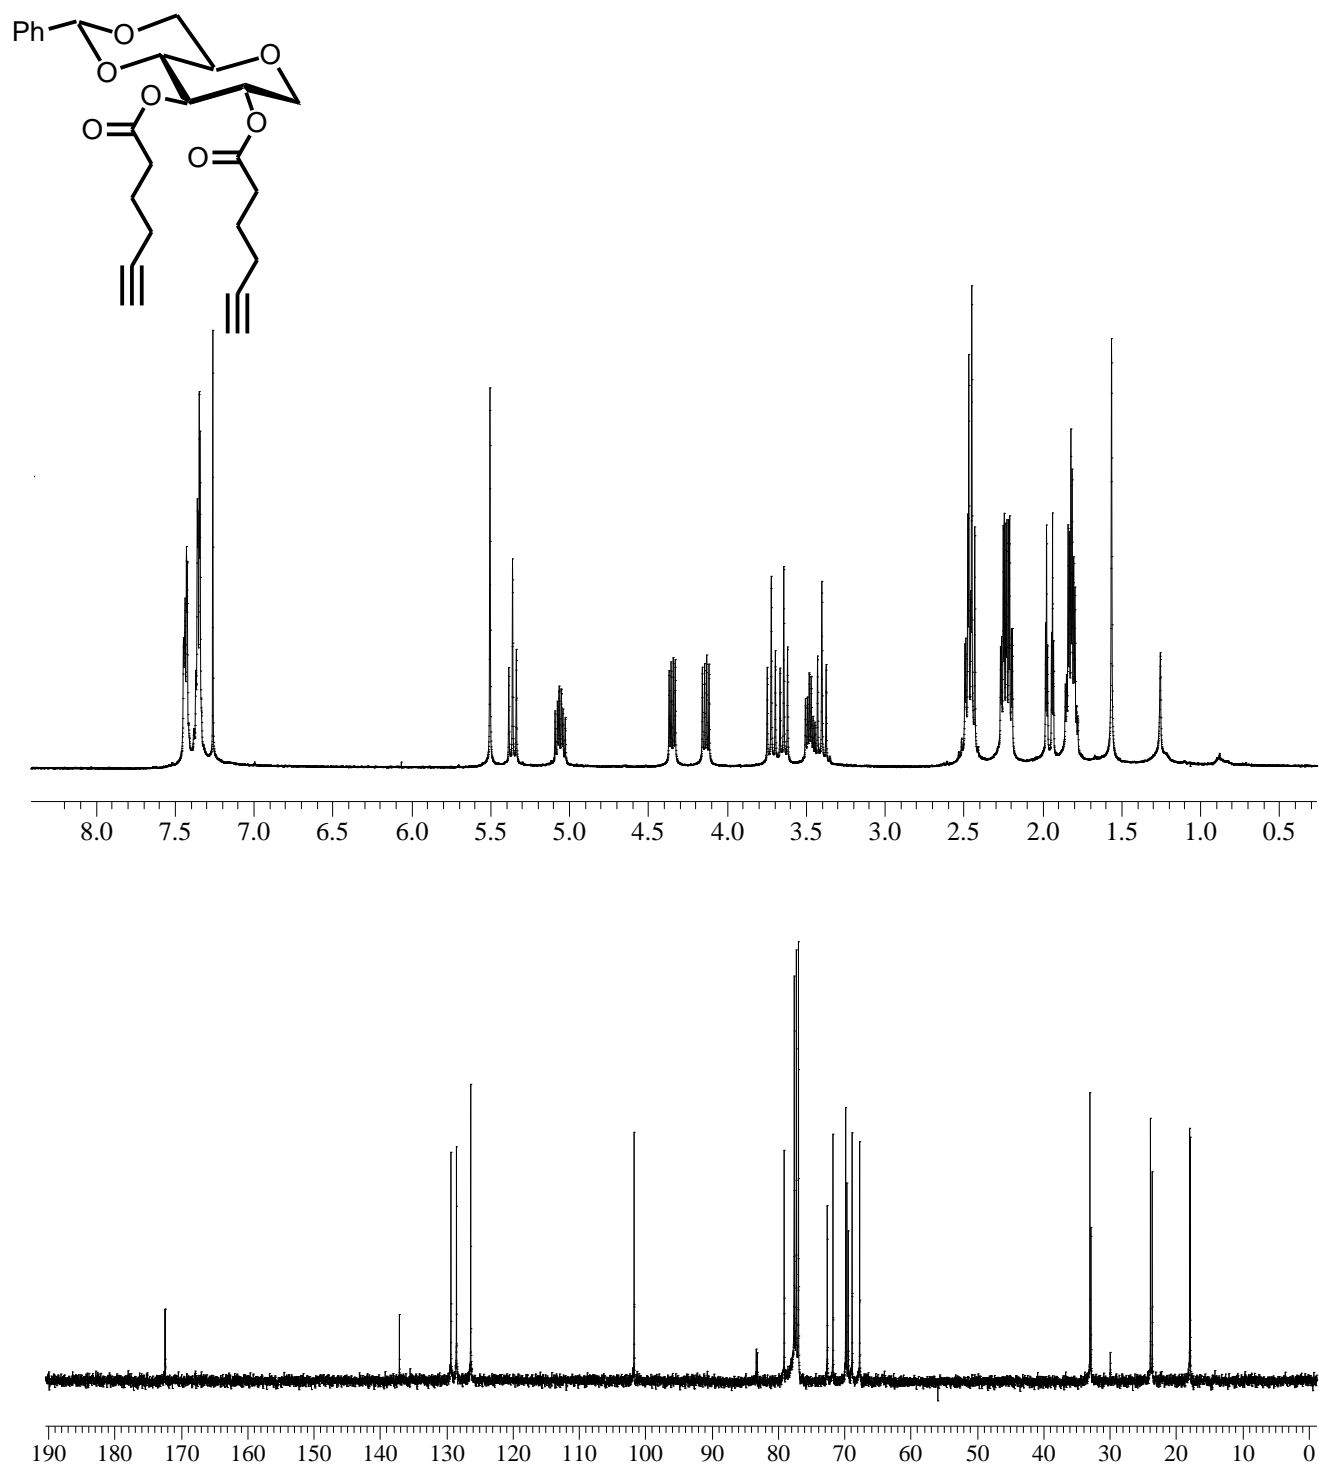

$^1\text{H}$  NMR (400 MHz,  $\text{CDCl}_3$ ) and  $^{13}\text{C}$  NMR (100 MHz,  $\text{CDCl}_3$ ) spectra of compound **10A**.

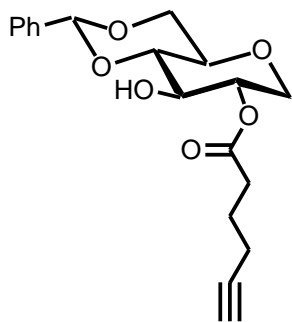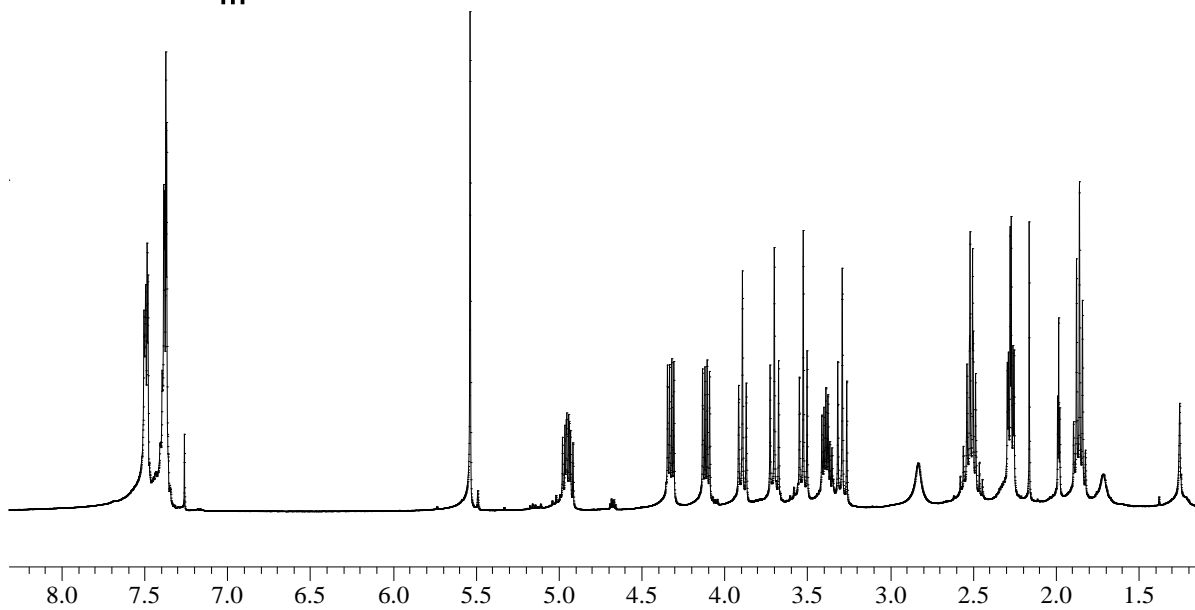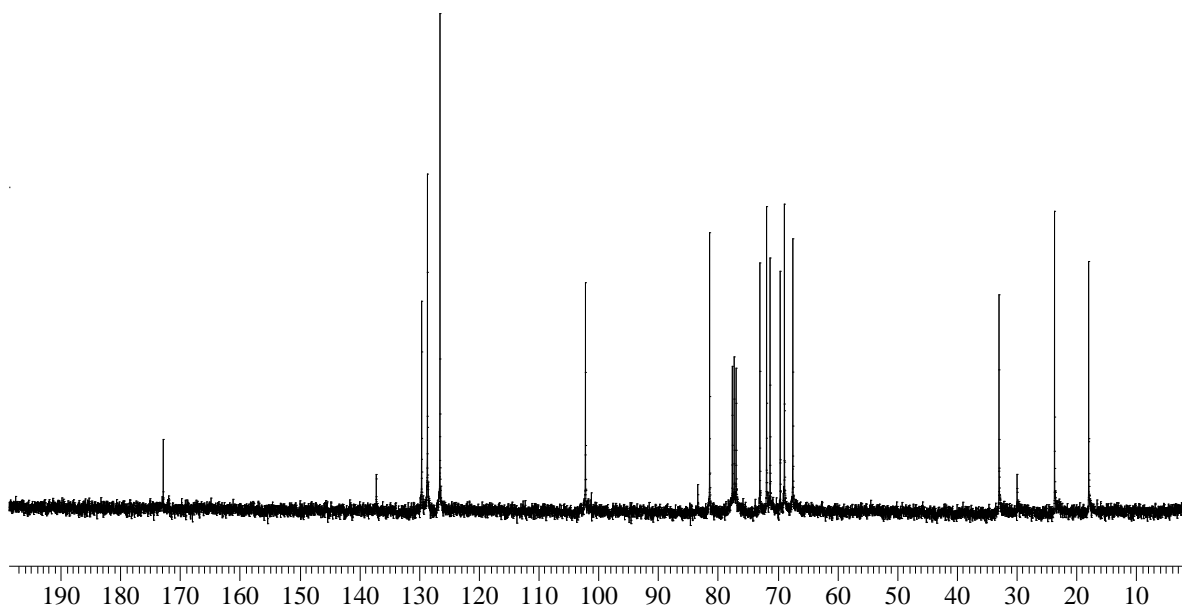

<sup>1</sup>H NMR (400 MHz, CDCl<sub>3</sub>) and <sup>13</sup>C NMR (100 MHz, CDCl<sub>3</sub>) spectra of compound **10B**.

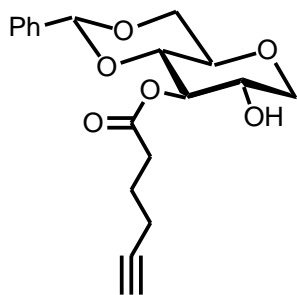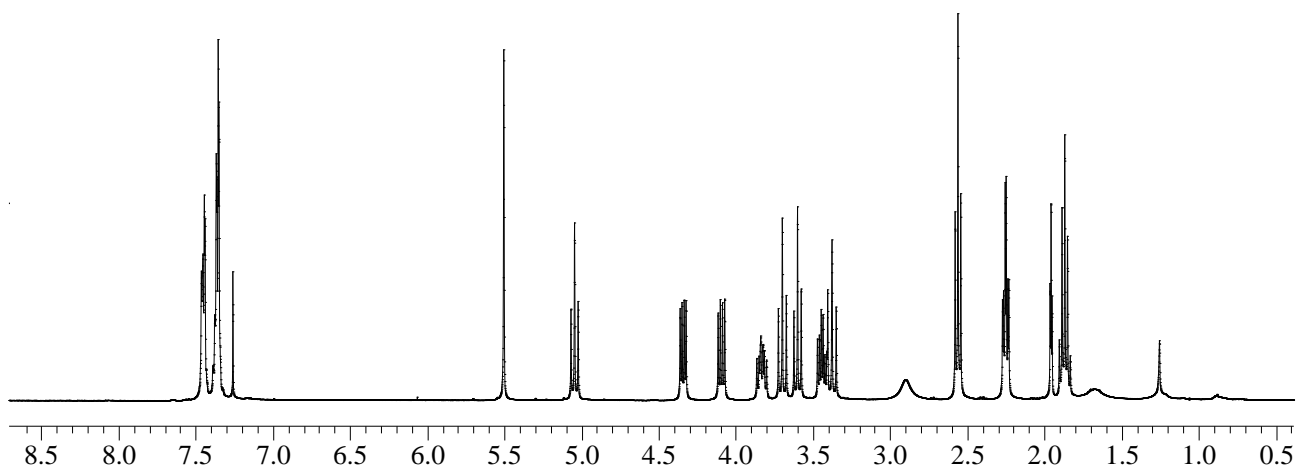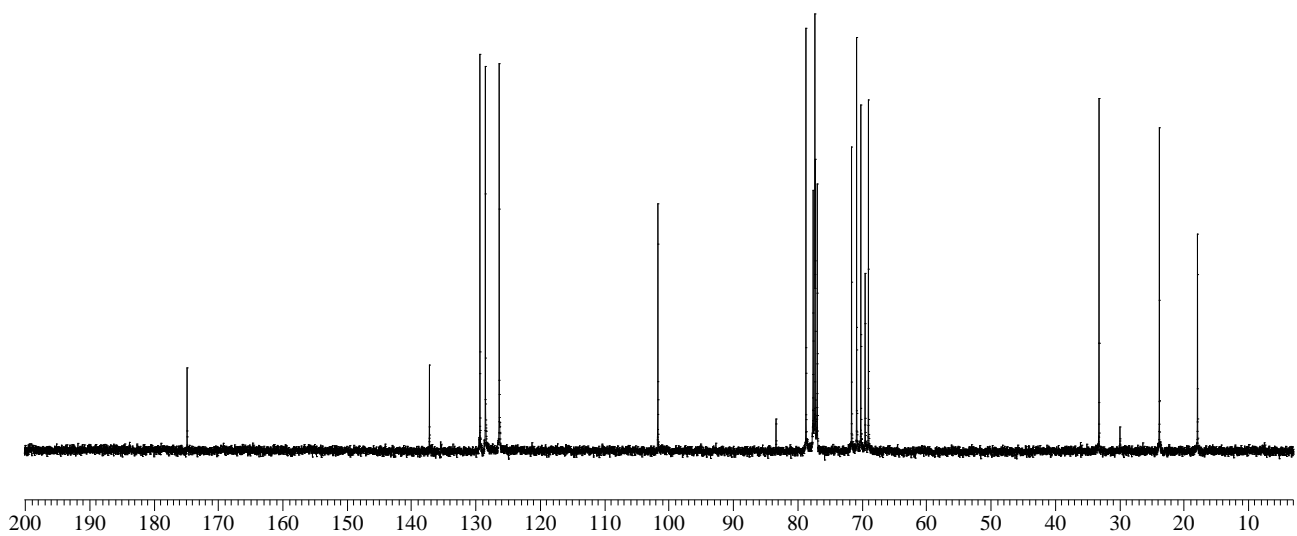

$^1\text{H}$  NMR (400 MHz,  $\text{CDCl}_3$ ) and  $^{13}\text{C}$  NMR (100 MHz,  $\text{CDCl}_3$ ) spectra of compound **10C**.



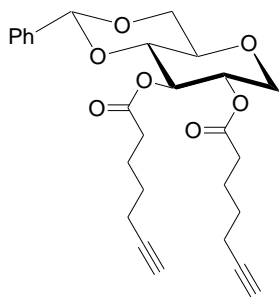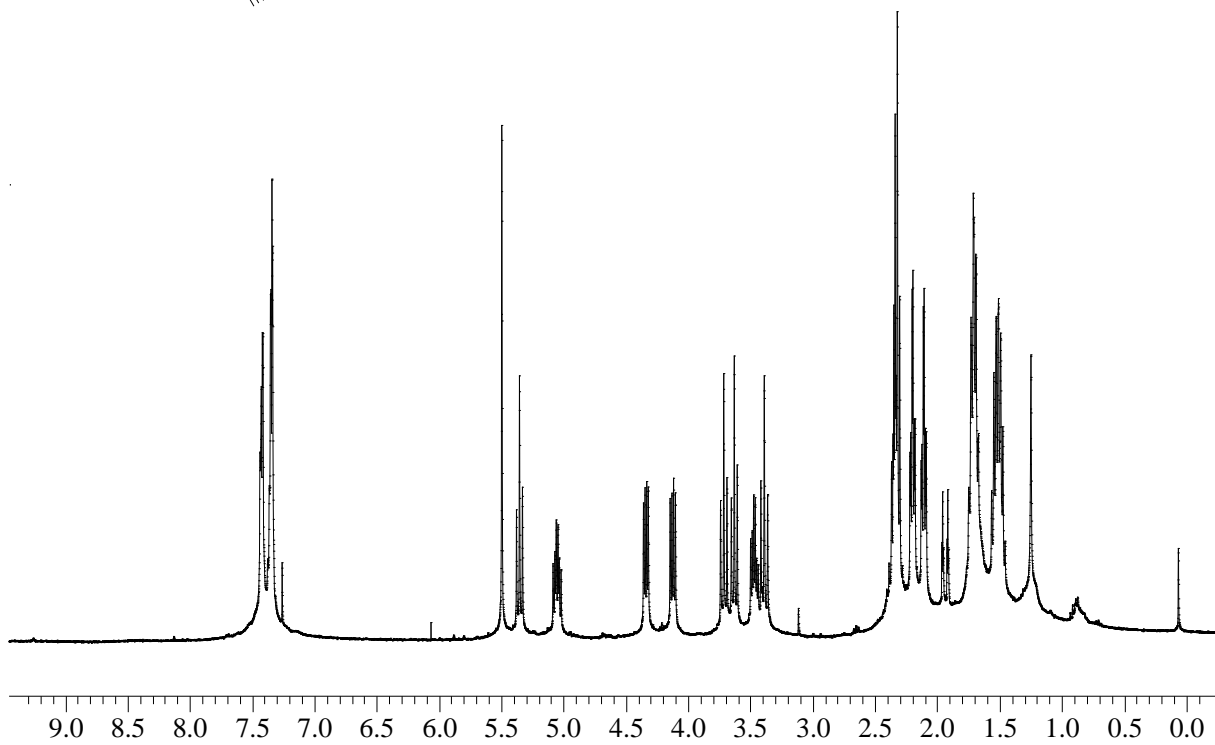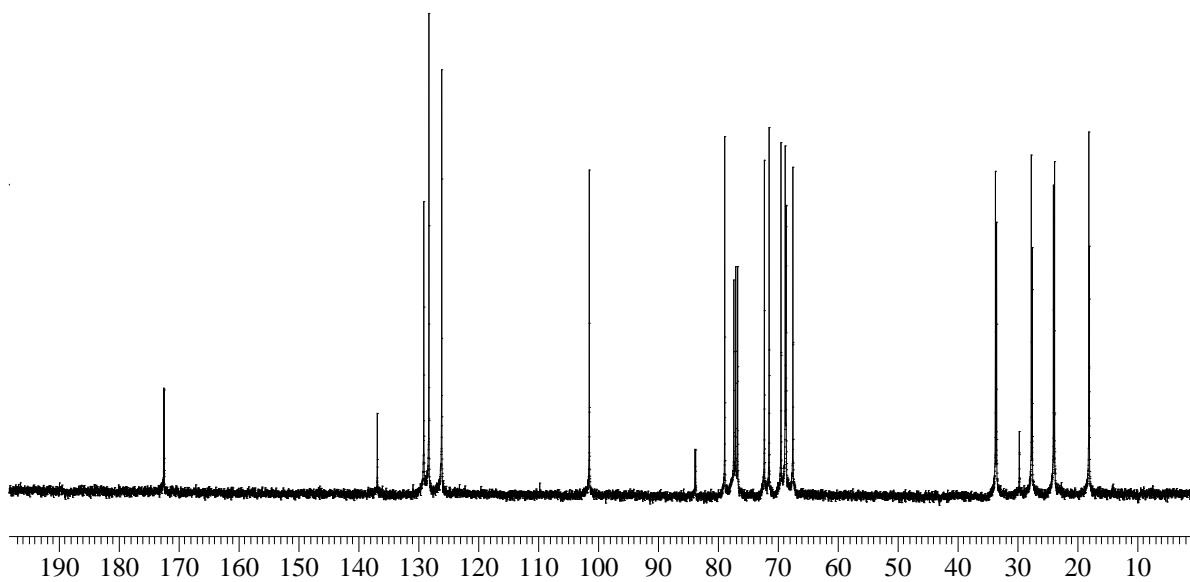

<sup>1</sup>H (400 MHz, CDCl<sub>3</sub>) and <sup>13</sup>C NMR (100 MHz, CDCl<sub>3</sub>) spectra of compound **11A**.

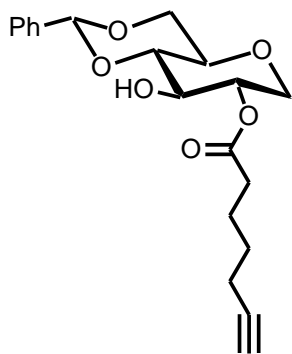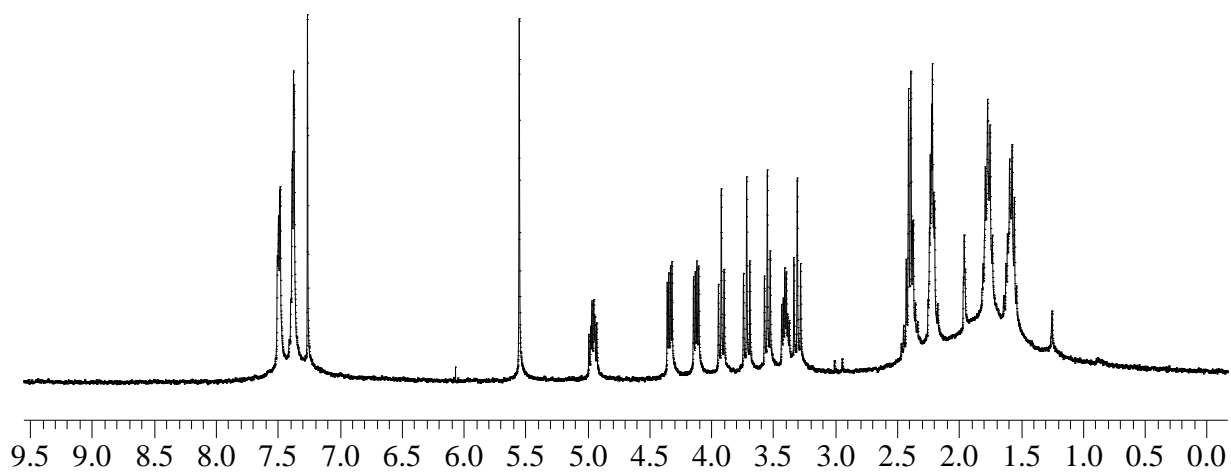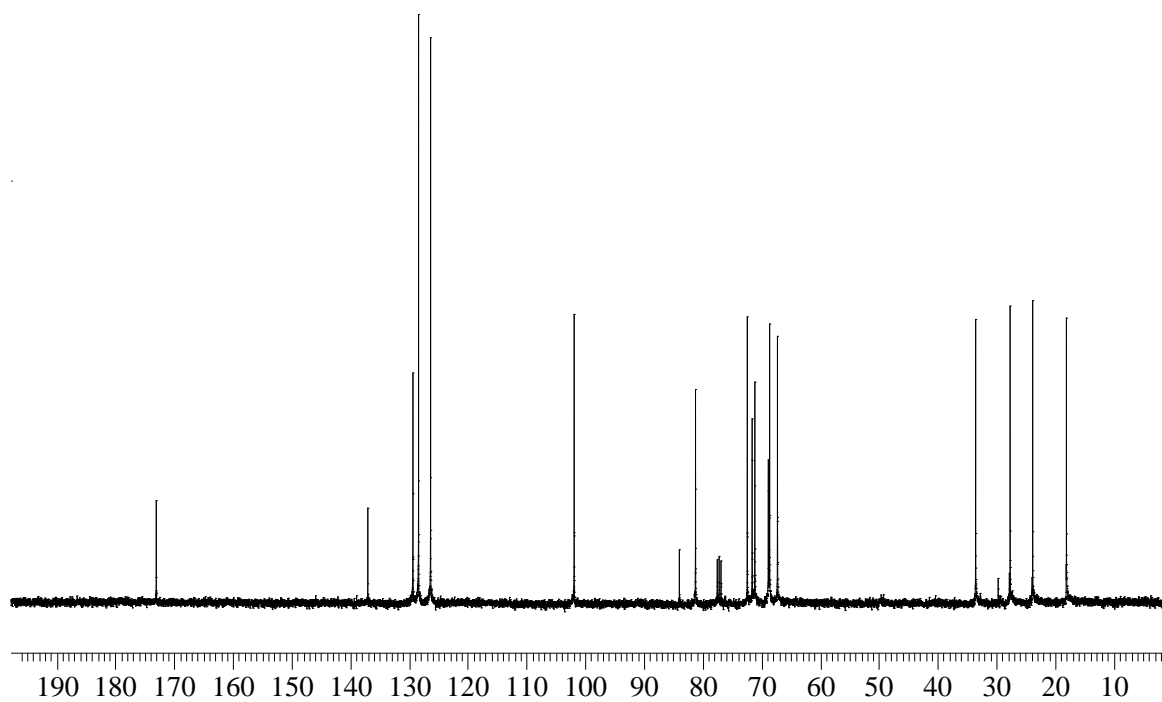

$^1\text{H}$  NMR (400 MHz,  $\text{CDCl}_3$ ) and  $^{13}\text{C}$  NMR (100 MHz,  $\text{CDCl}_3$ ) spectra of compound **11B**.

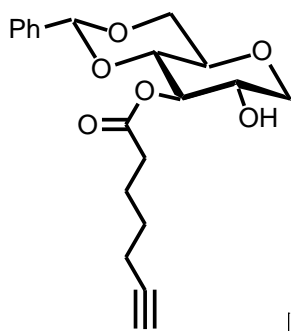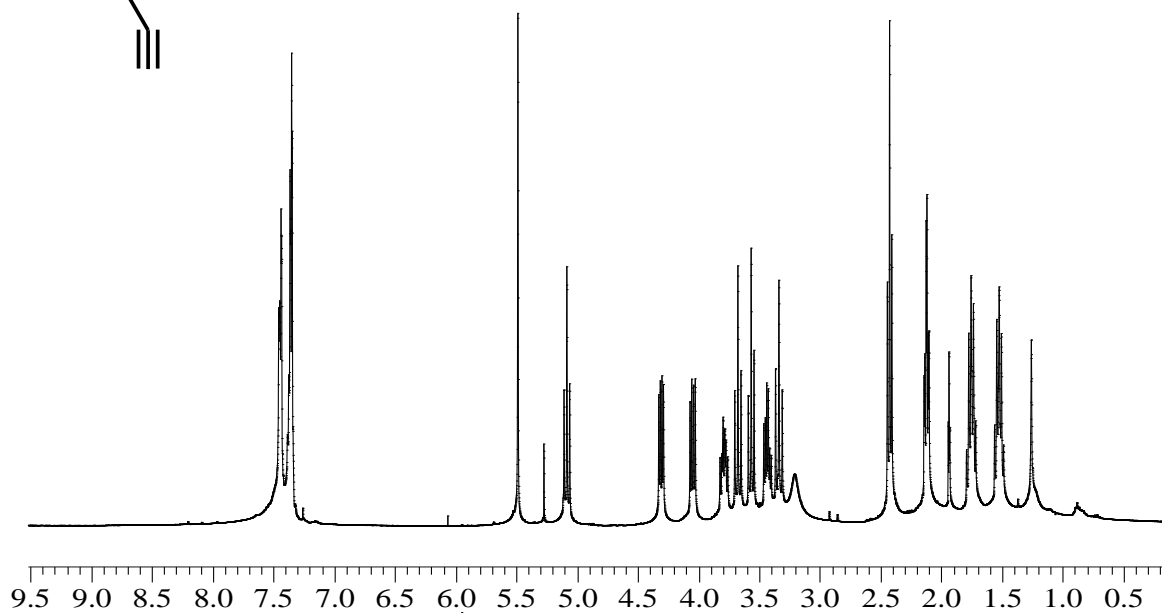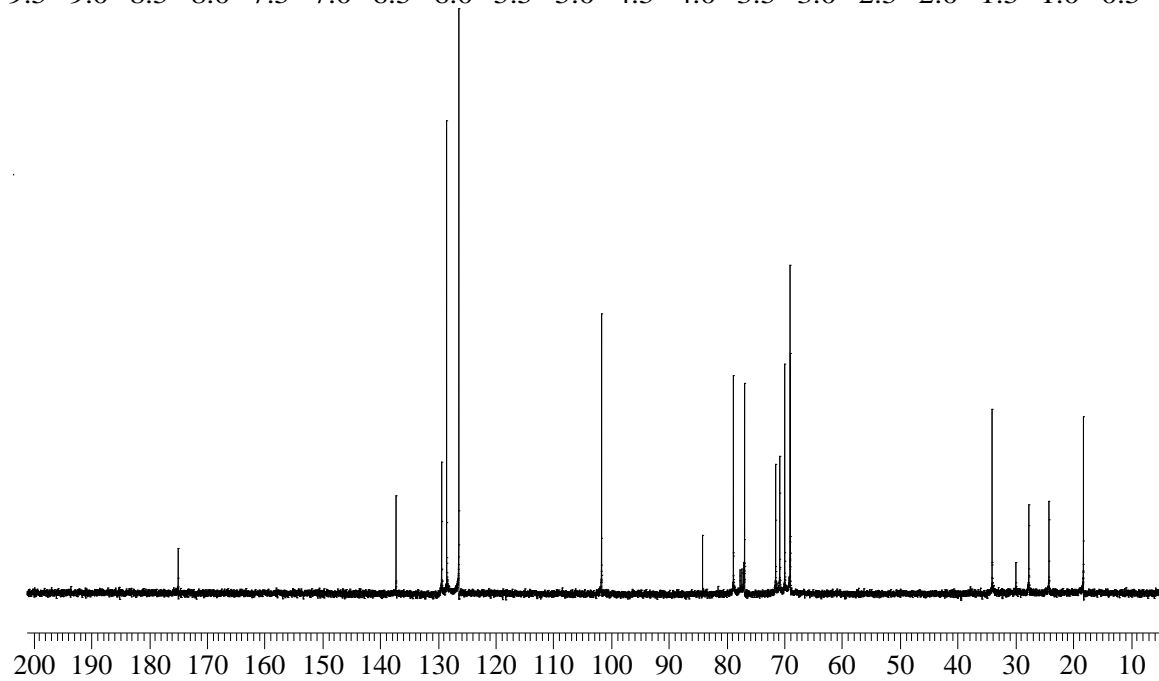

$^1\text{H}$  (400 MHz,  $\text{CDCl}_3$ ) and  $^{13}\text{C}$  NMR (100 MHz,  $\text{CDCl}_3$ ) spectra of compound 11C.

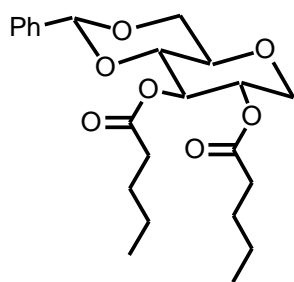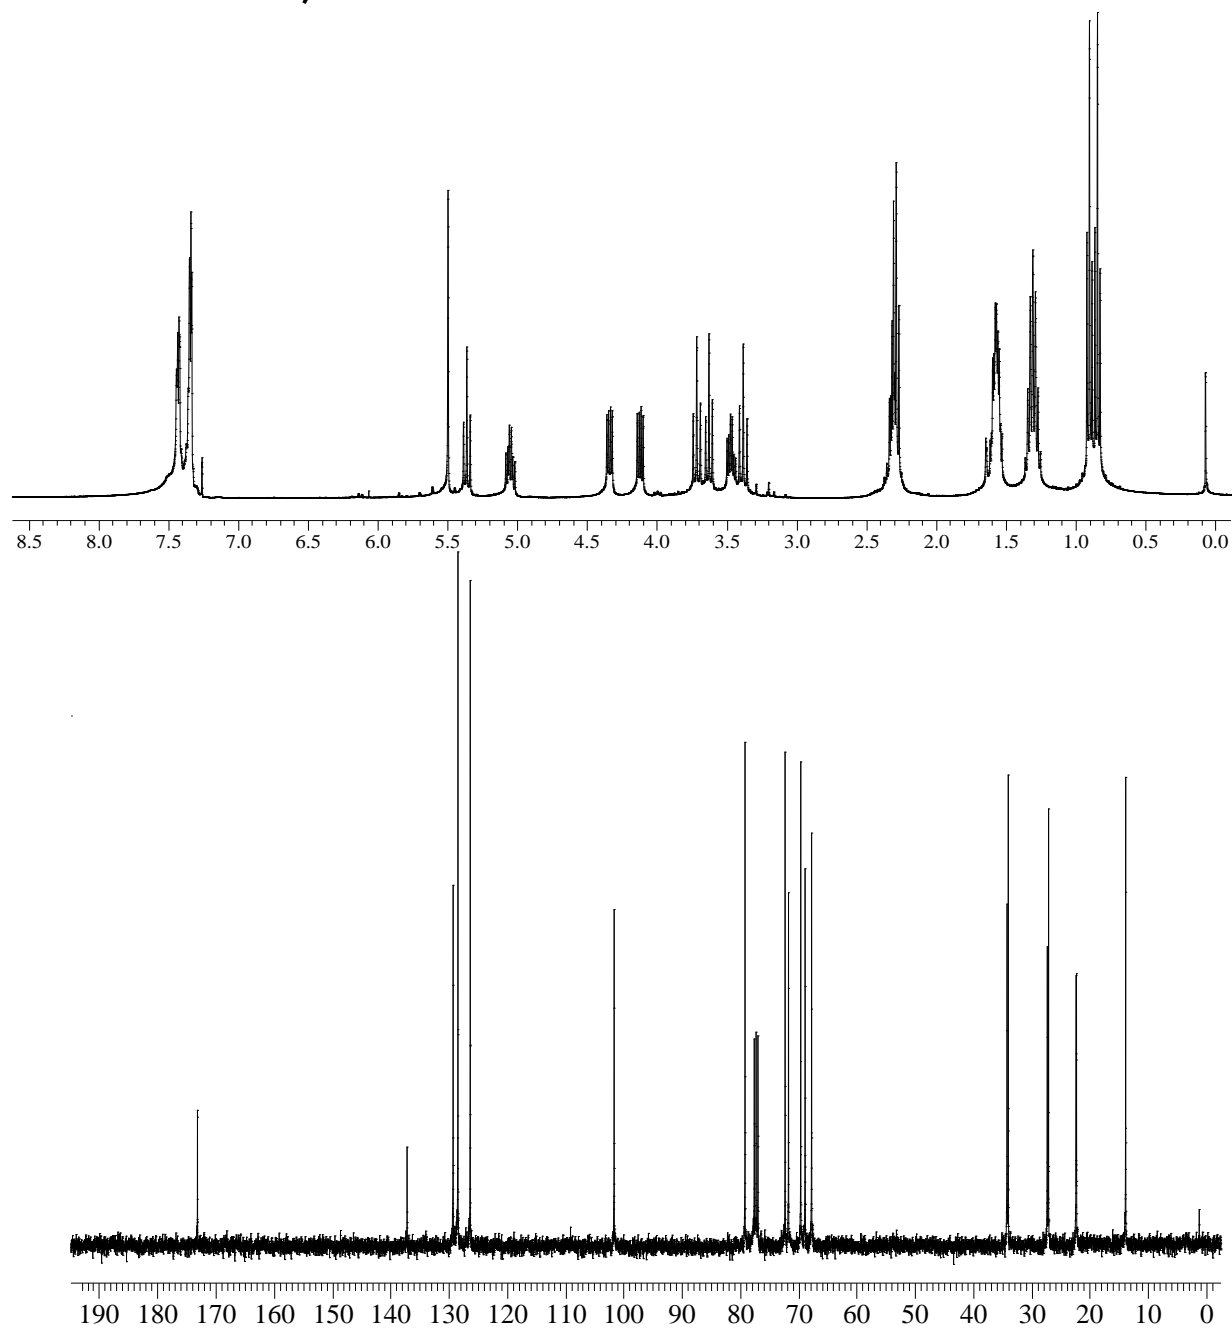

$^1\text{H}$  (400 MHz,  $\text{CDCl}_3$ ) and  $^{13}\text{C}$  NMR (100 MHz,  $\text{CDCl}_3$ ) spectra of compound **12A**.

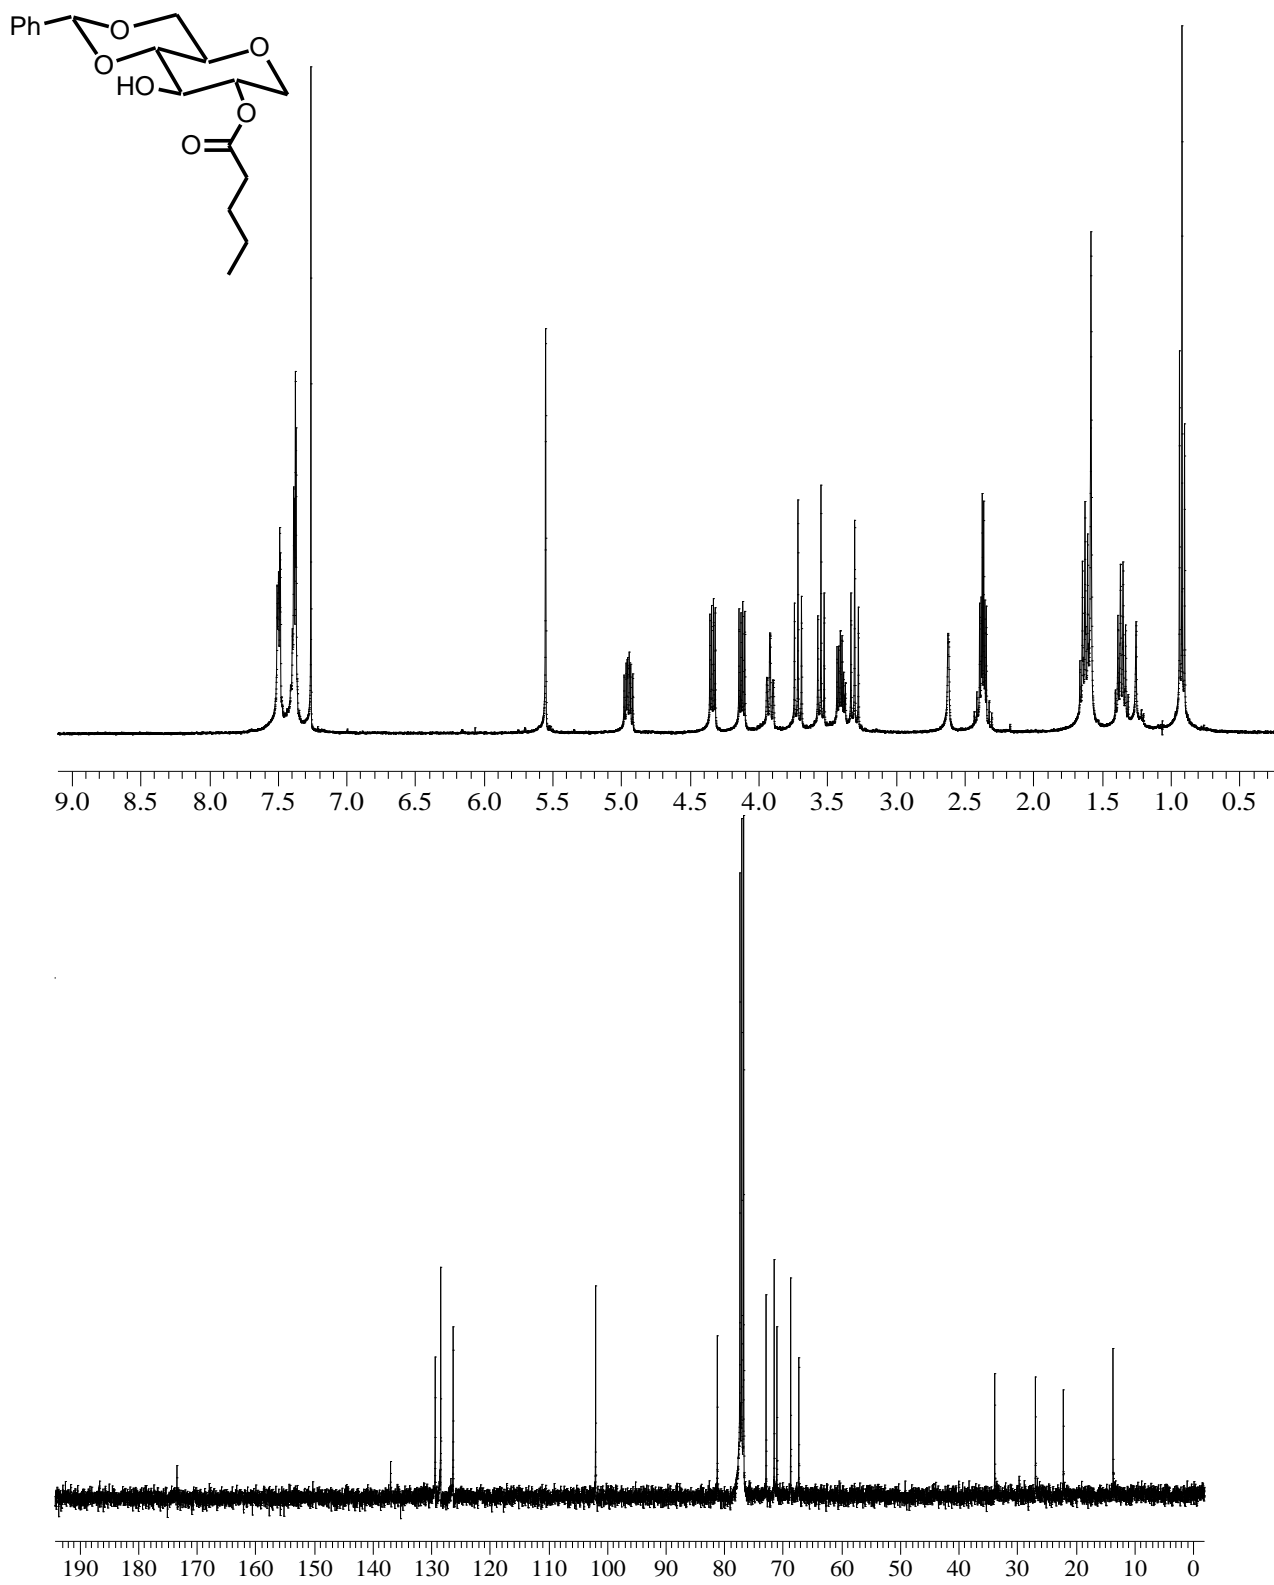

$^1\text{H}$  (400 MHz,  $\text{CDCl}_3$ ) and  $^{13}\text{C}$  NMR (100 MHz,  $\text{CDCl}_3$ ) spectra of compound **12B**.

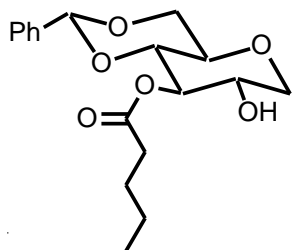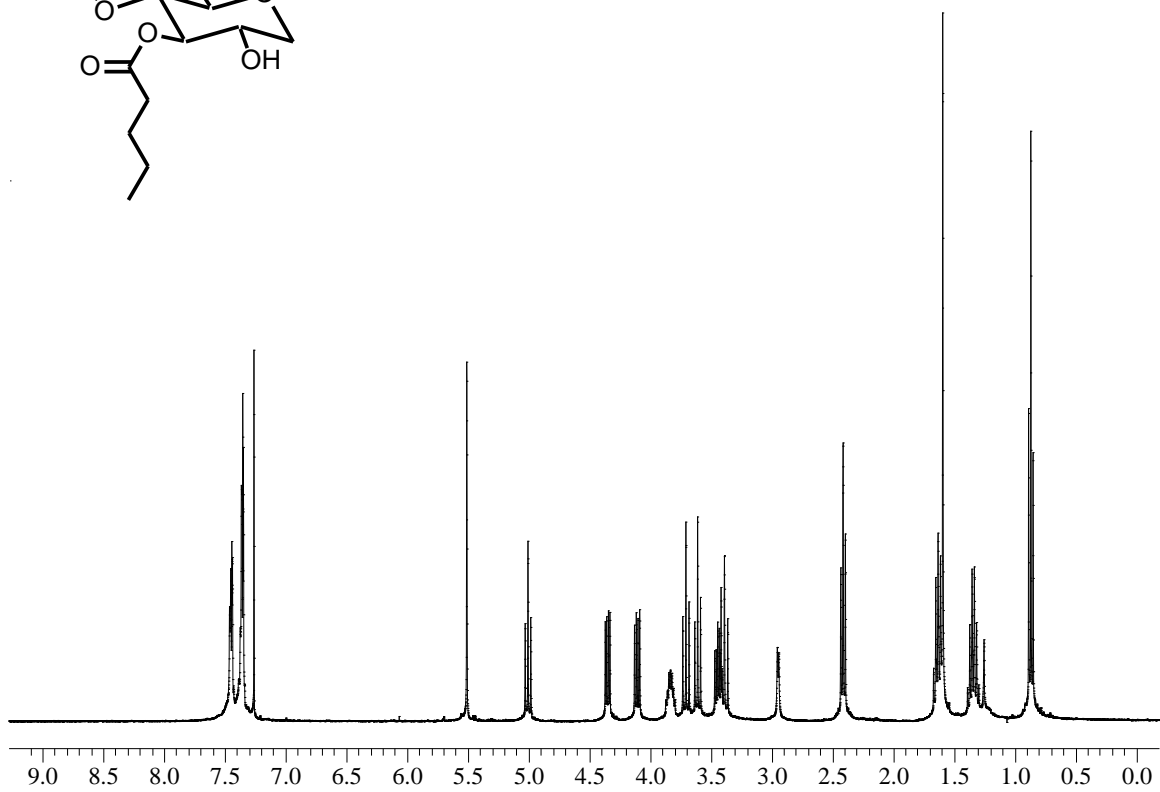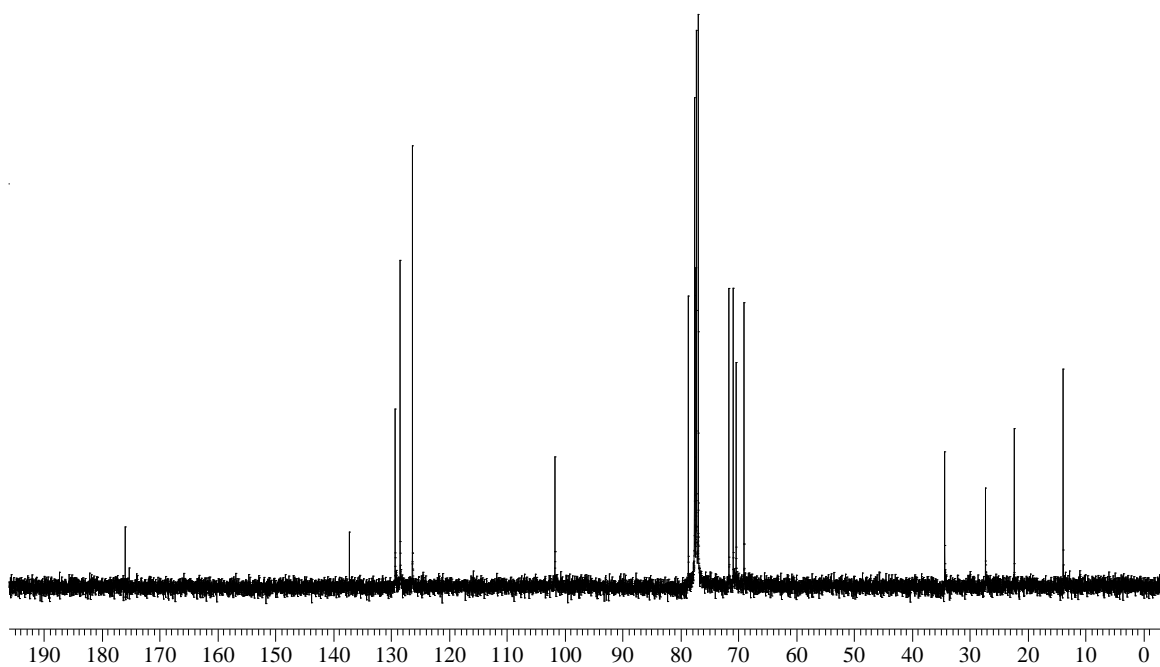

$^1\text{H}$  (400 MHz,  $\text{CDCl}_3$ ) and  $^{13}\text{C}$  NMR (100 MHz,  $\text{CDCl}_3$ ) spectra of compound 12C.

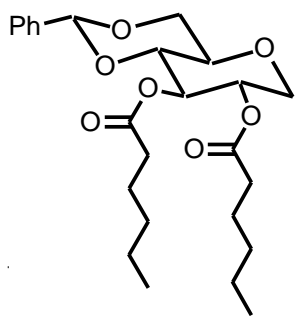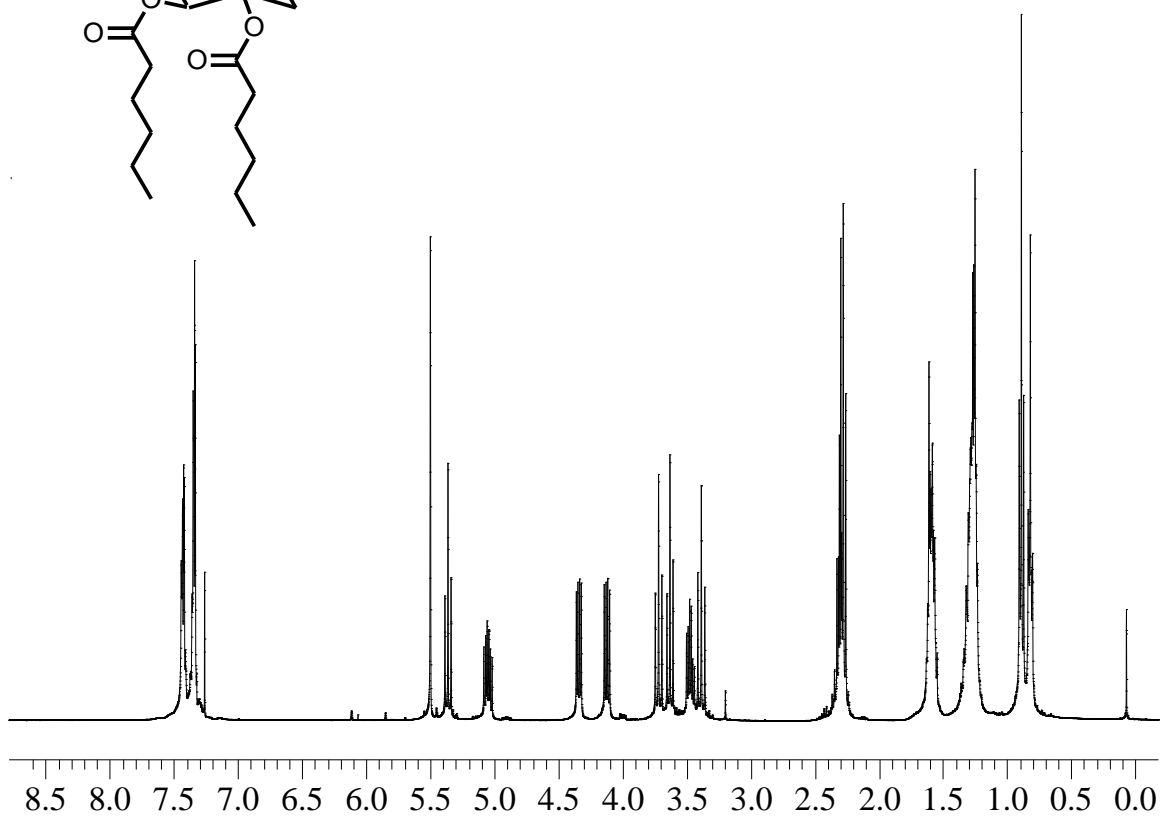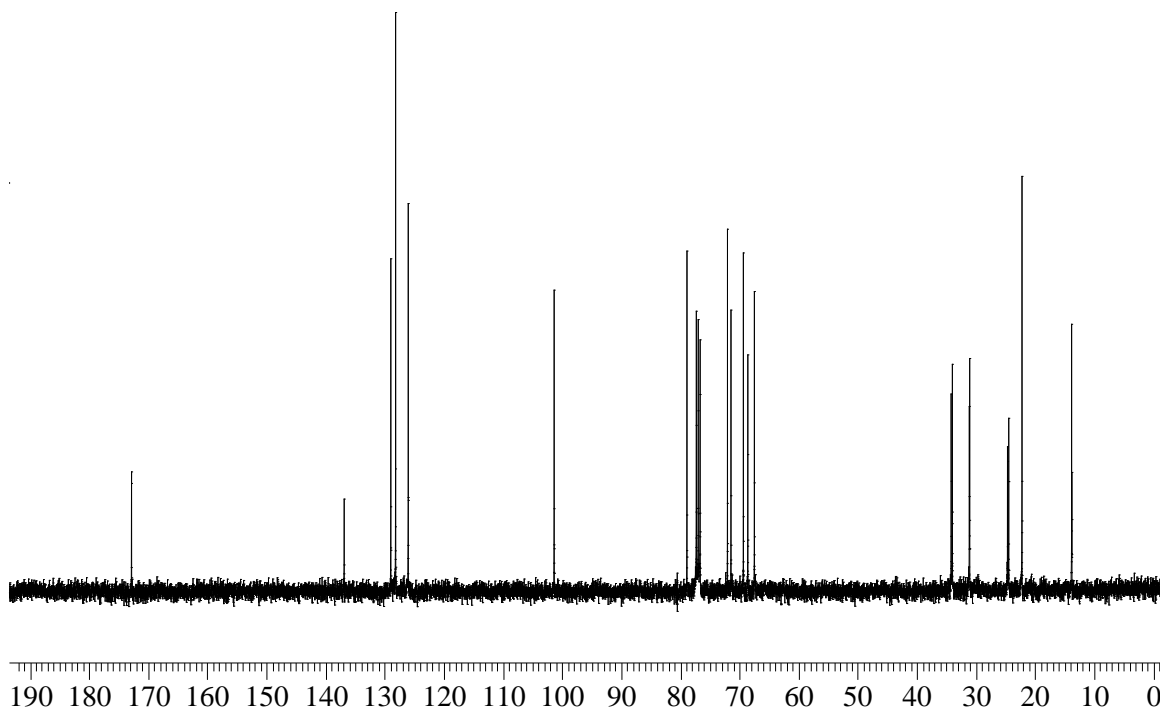

$^1\text{H}$  (400 MHz,  $\text{CDCl}_3$ ) and  $^{13}\text{C}$  NMR (100 MHz,  $\text{CDCl}_3$ ) spectra of compound **13A**.

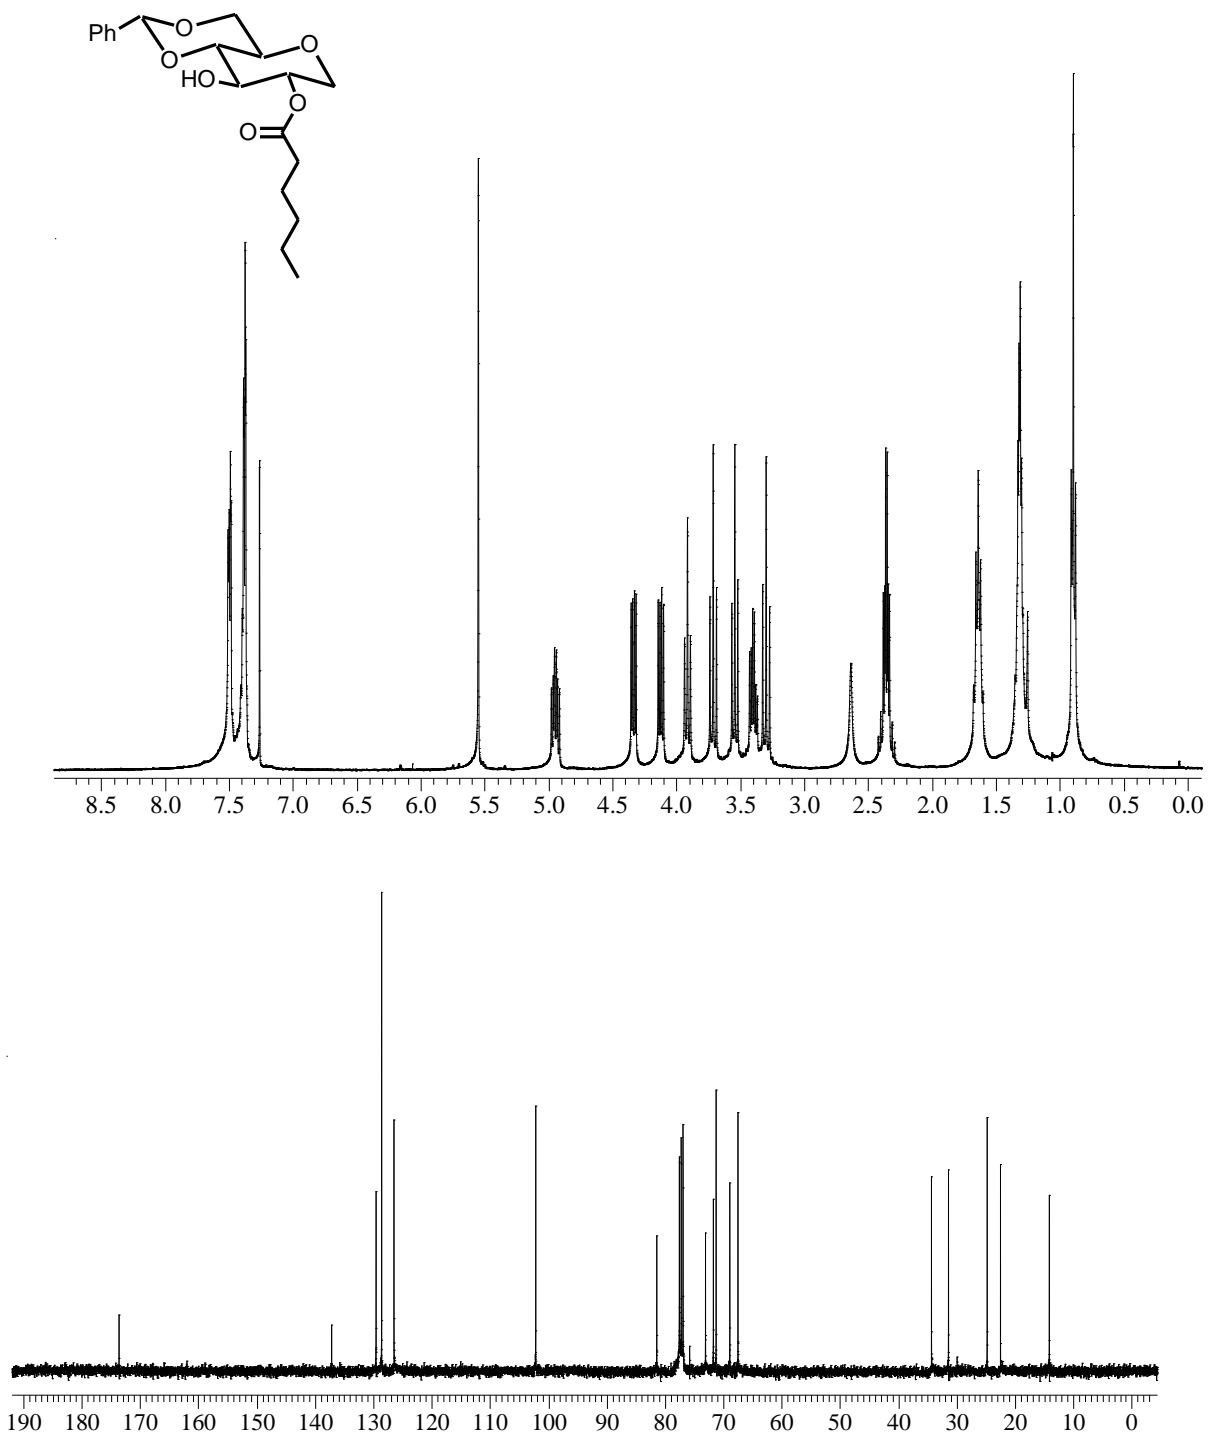

$^1\text{H}$  NMR (400 MHz,  $\text{CDCl}_3$ ) and  $^{13}\text{C}$  NMR (100 MHz,  $\text{CDCl}_3$ ) spectra of compound **13B**.



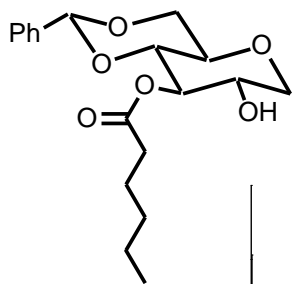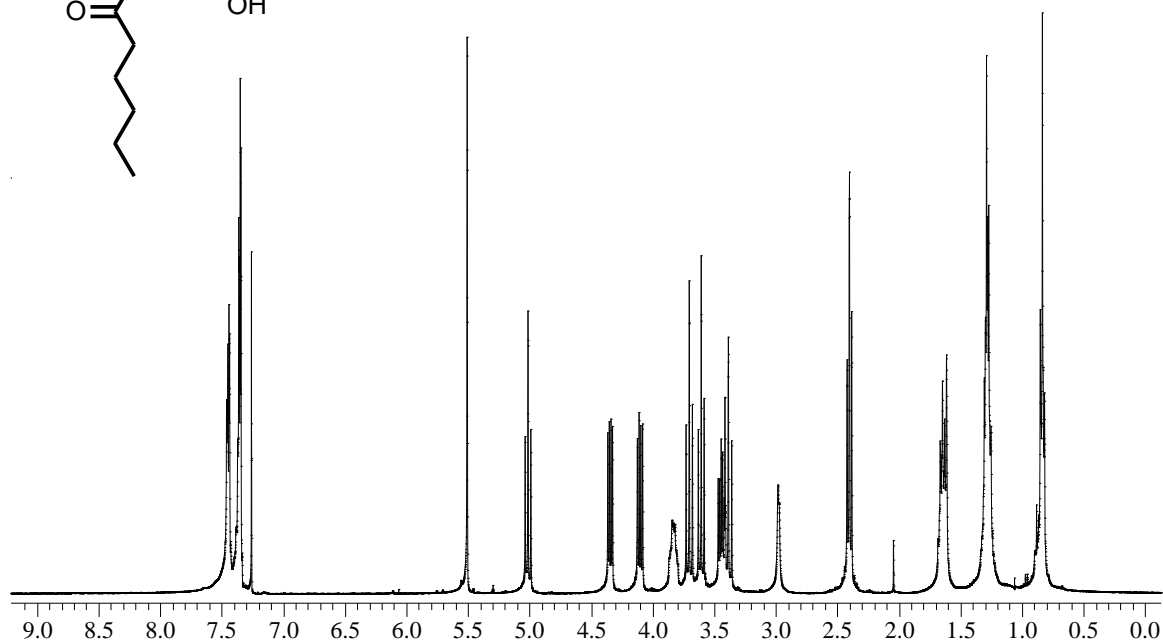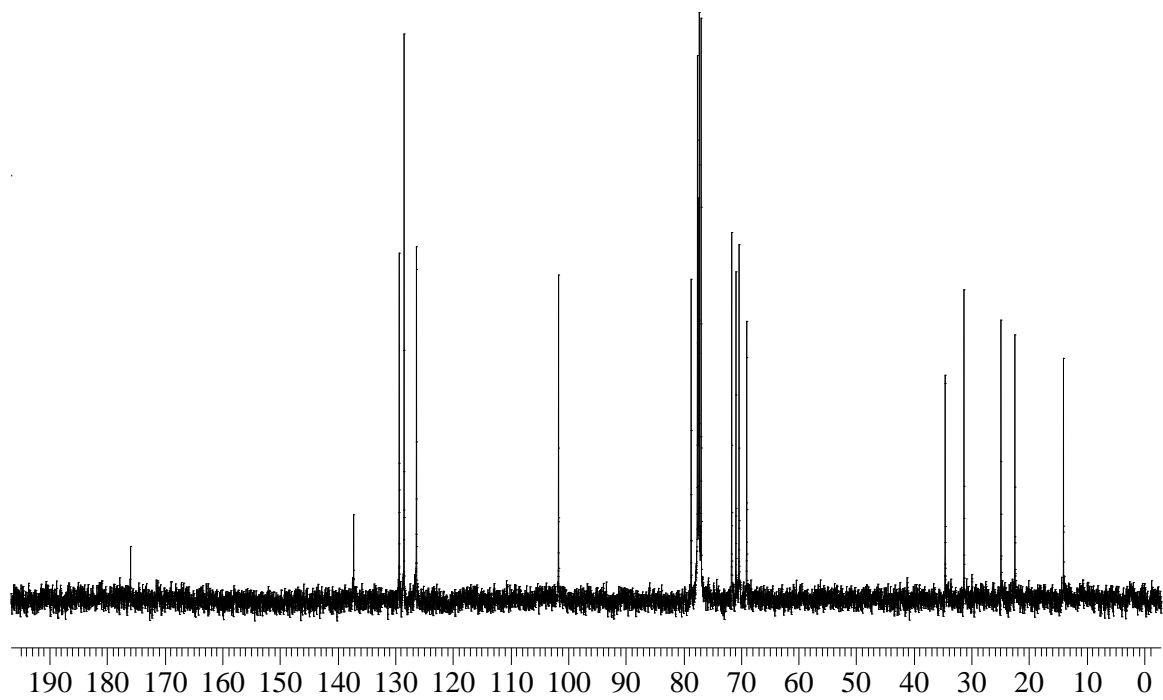

$^1\text{H}$  (400 MHz,  $\text{CDCl}_3$ ) and  $^{13}\text{C}$  NMR (100 MHz,  $\text{CDCl}_3$ ) spectra of compound **13C**.

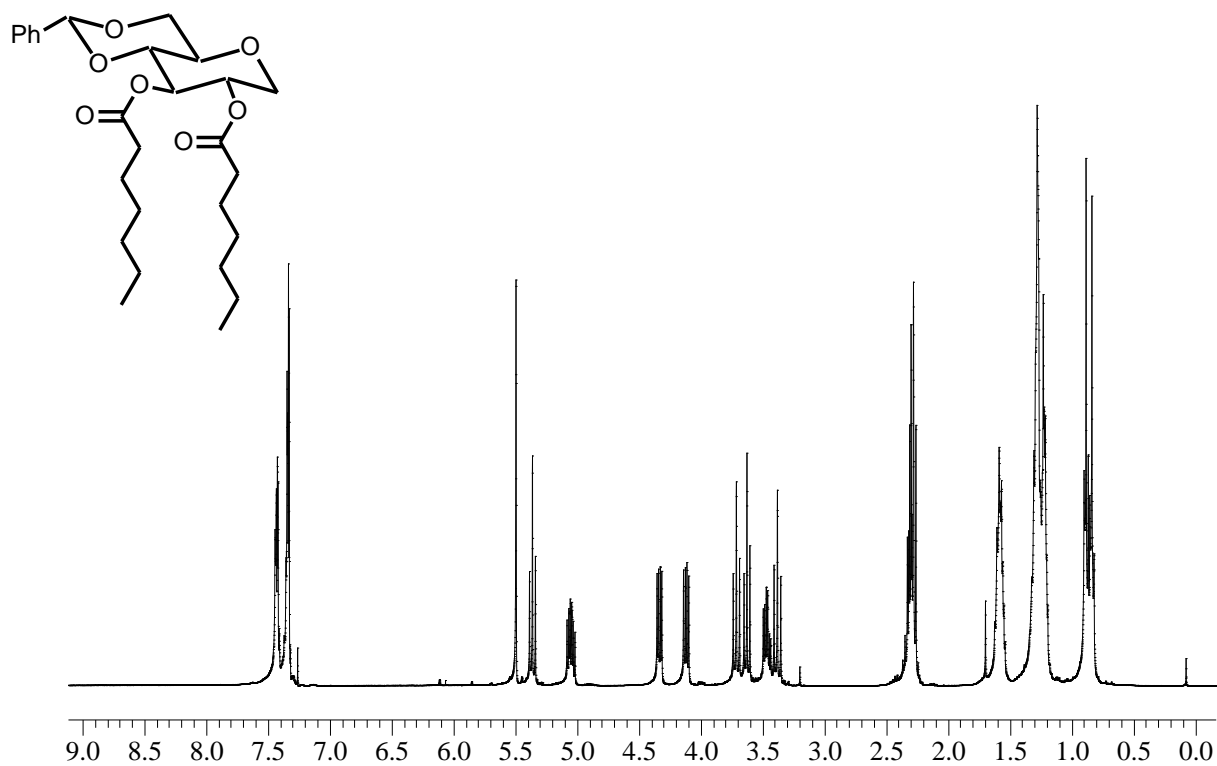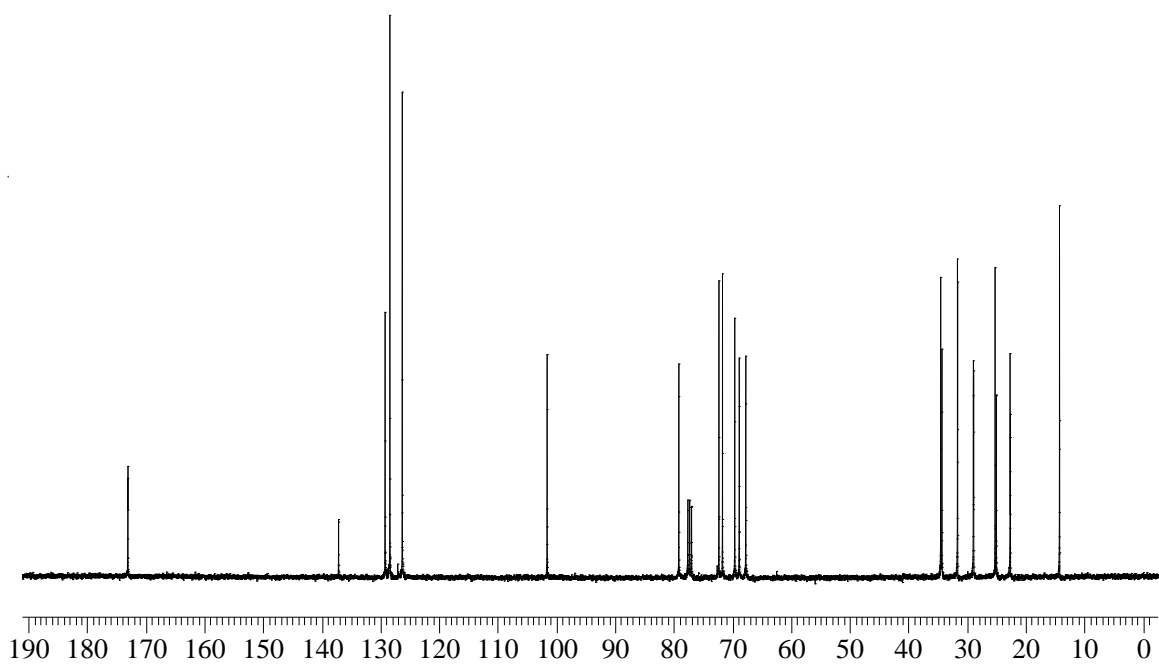

$^1\text{H}$  (400 MHz,  $\text{CDCl}_3$ ) and  $^{13}\text{C}$  NMR (100 MHz,  $\text{CDCl}_3$ ) spectra of compound **14A**.

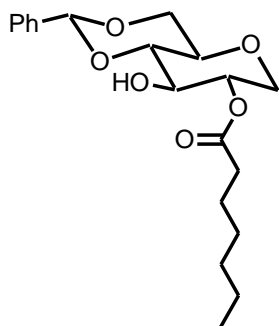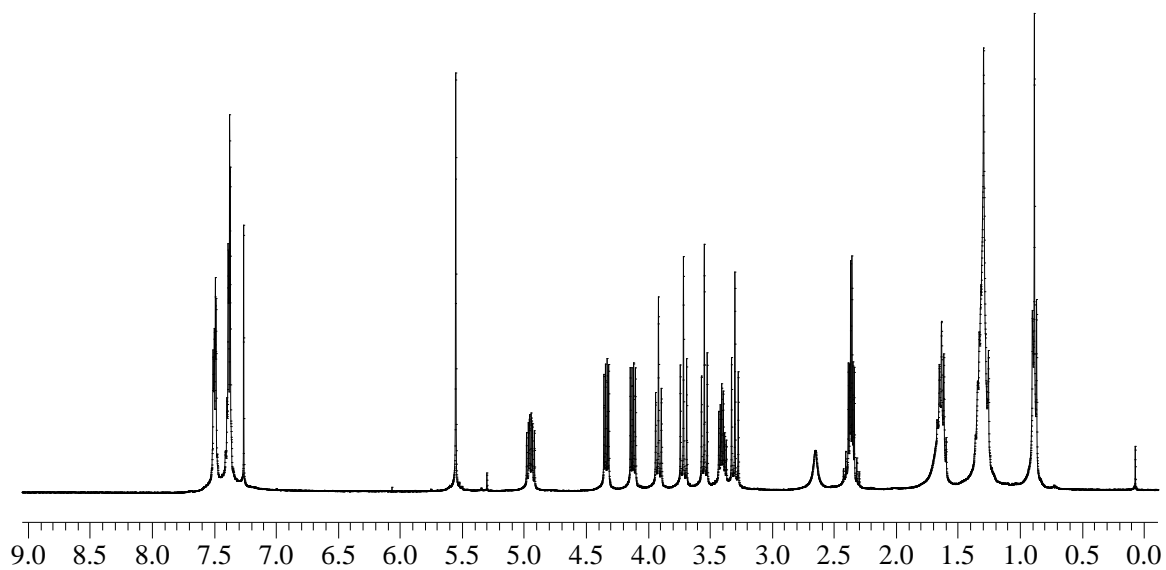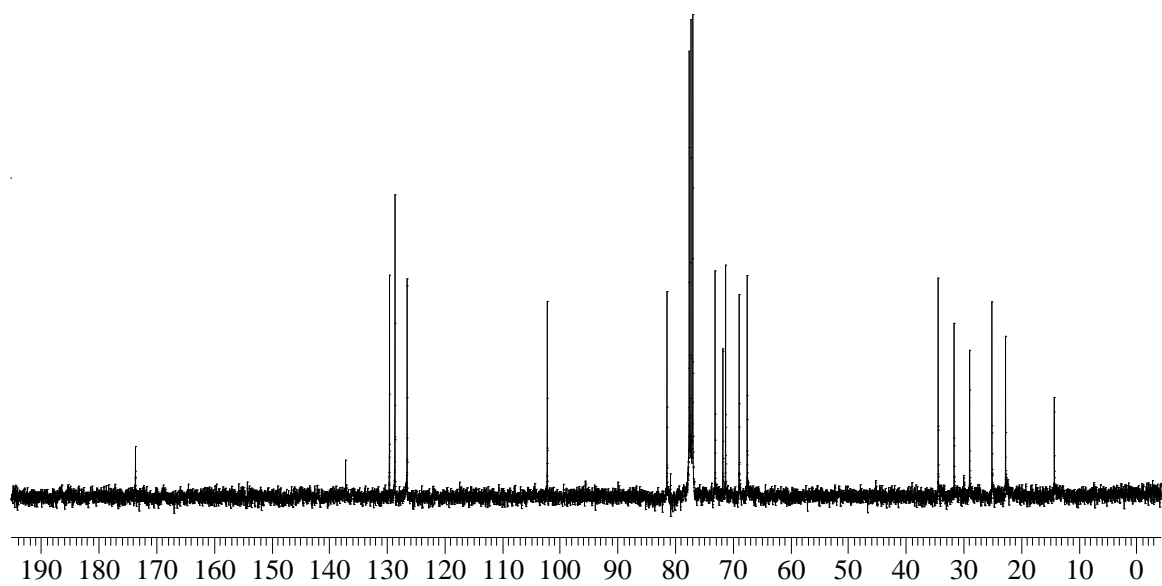

$^1\text{H}$  (400 MHz,  $\text{CDCl}_3$ ) and  $^{13}\text{C}$  NMR (100 MHz,  $\text{CDCl}_3$ ) spectra of compound **14B**.

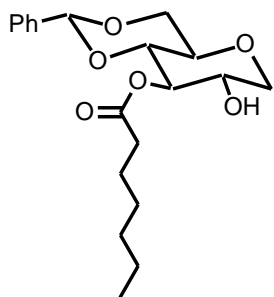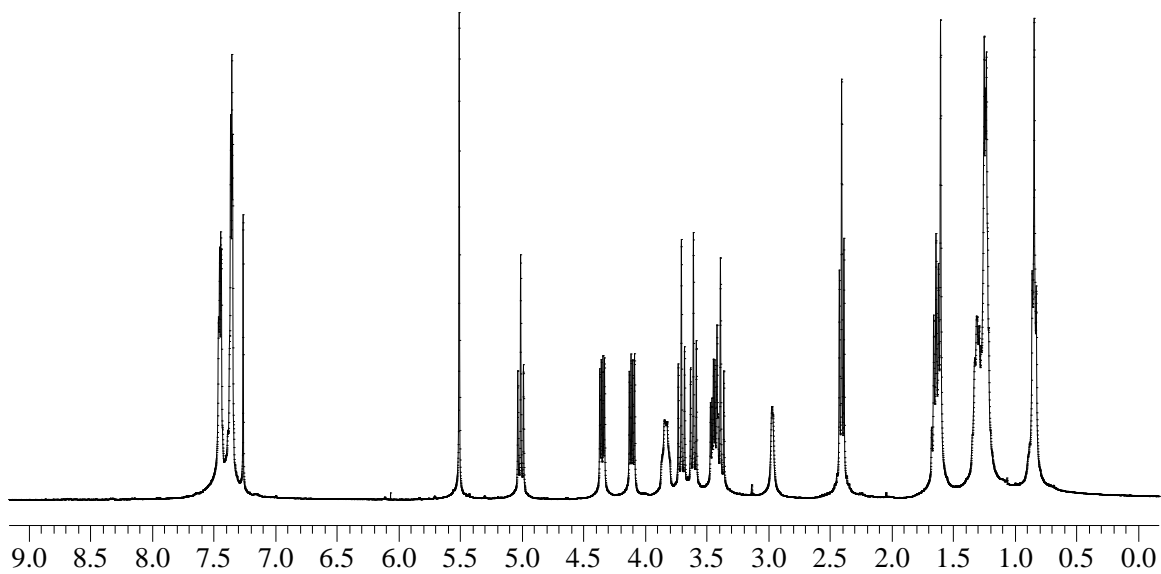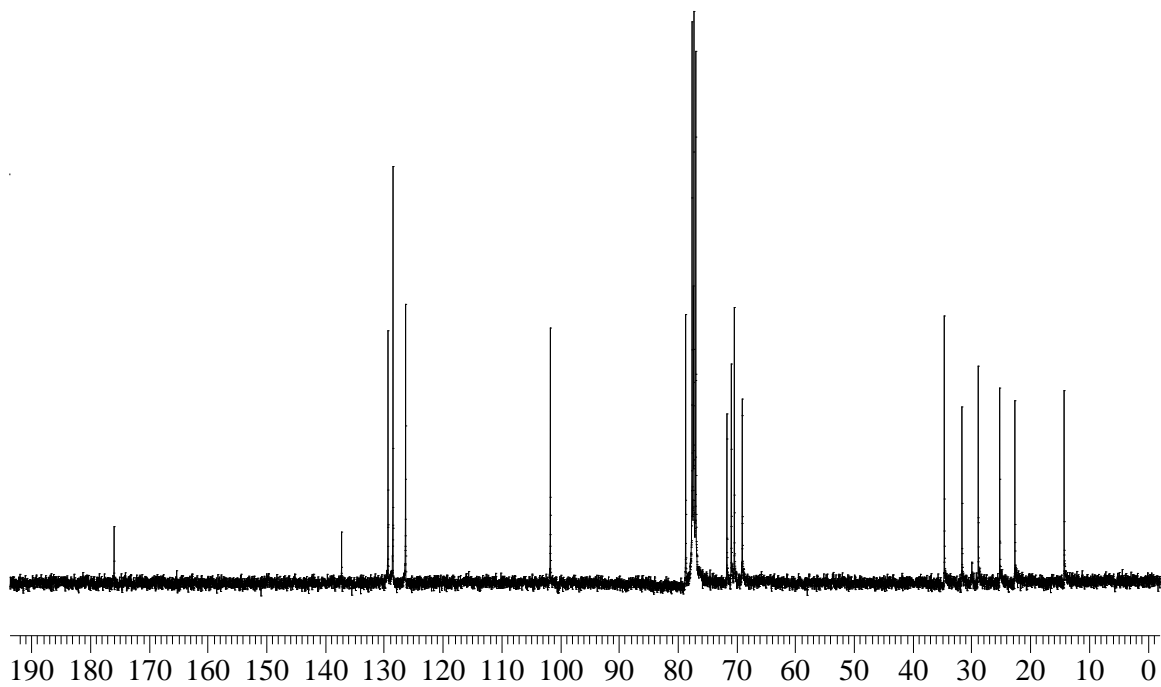

$^1\text{H}$  (400 MHz,  $\text{CDCl}_3$ ) and  $^{13}\text{C}$  NMR (100 MHz,  $\text{CDCl}_3$ ) spectra of compound 14C.

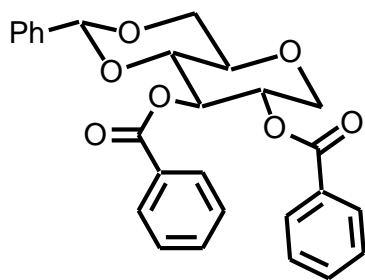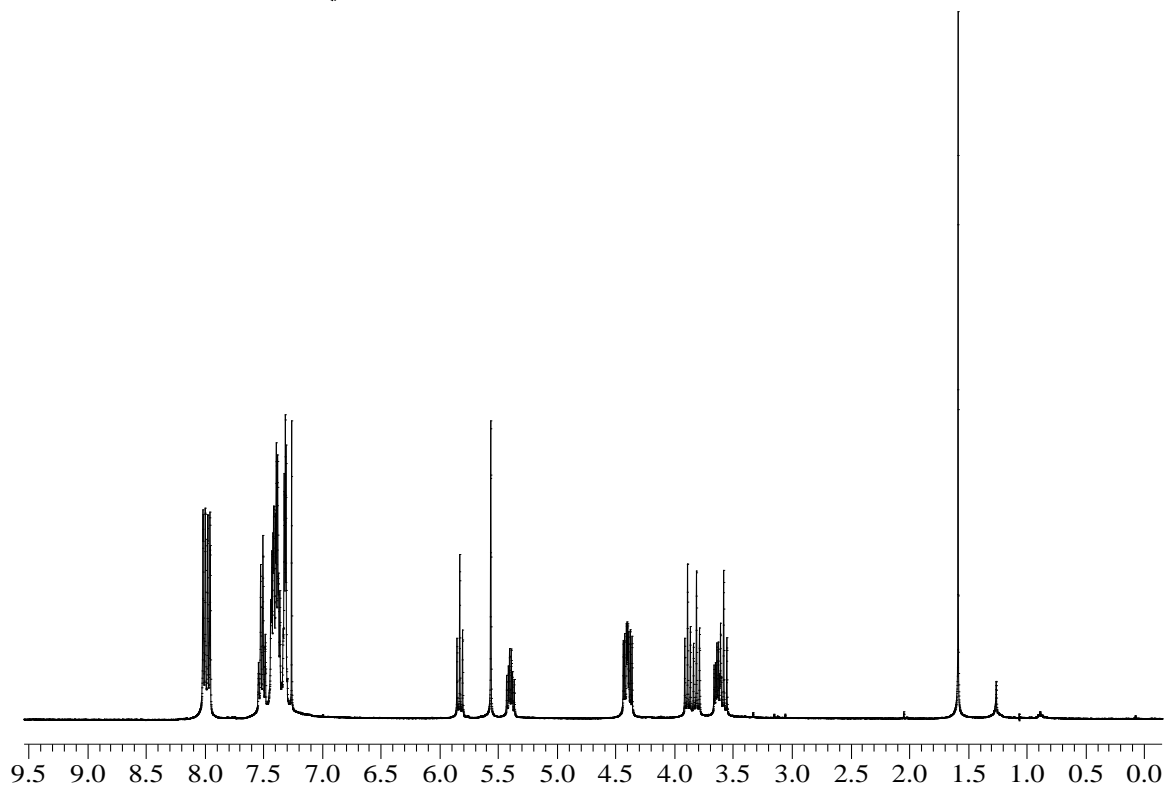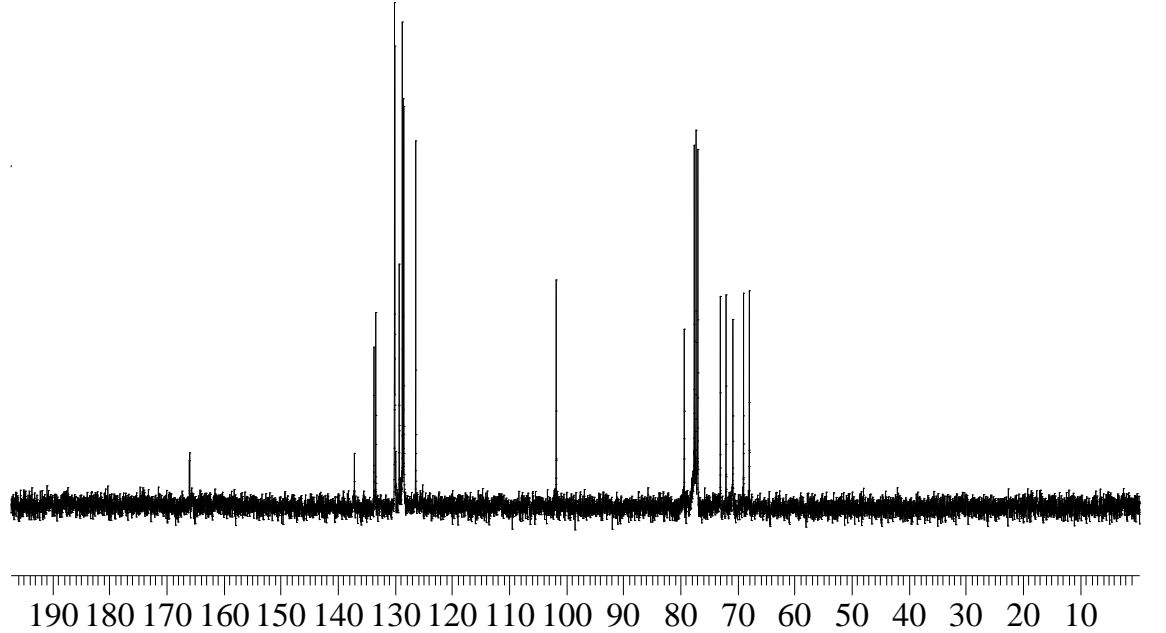

$^1\text{H}$  (400 MHz,  $\text{CDCl}_3$ ) and  $^{13}\text{C}$  NMR (100 MHz,  $\text{CDCl}_3$ ) spectra of compound **15A**.

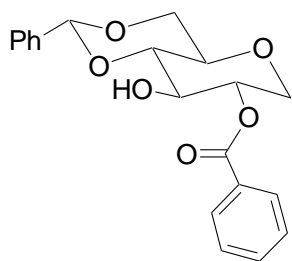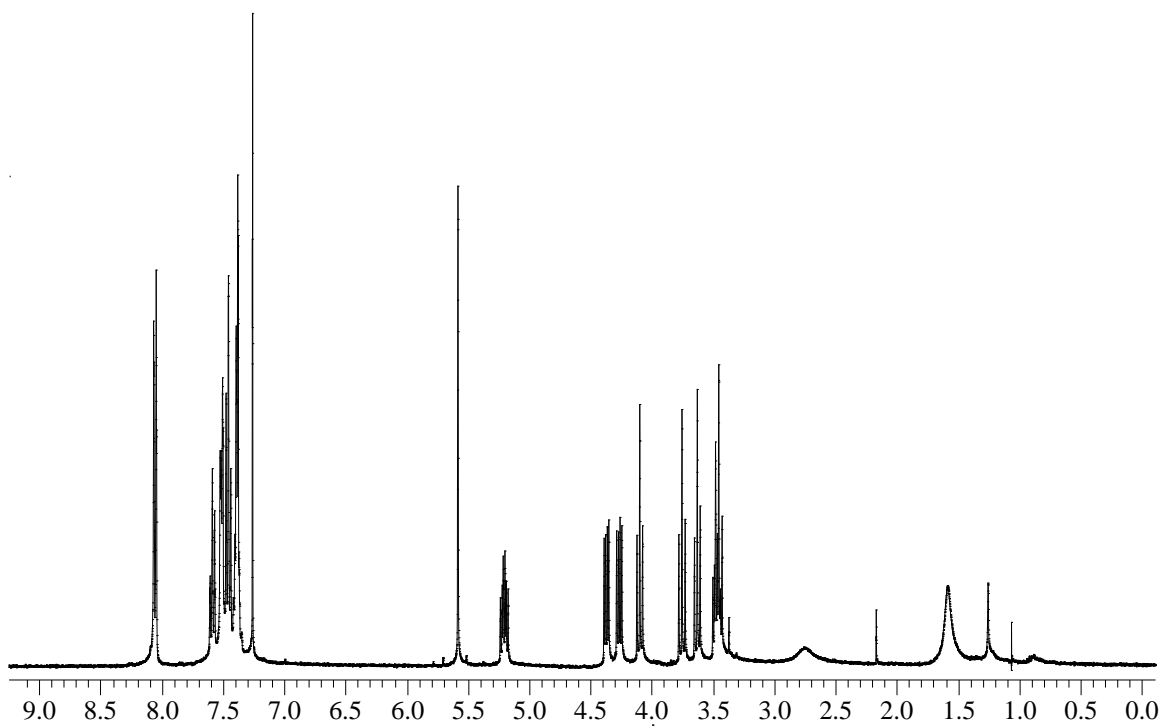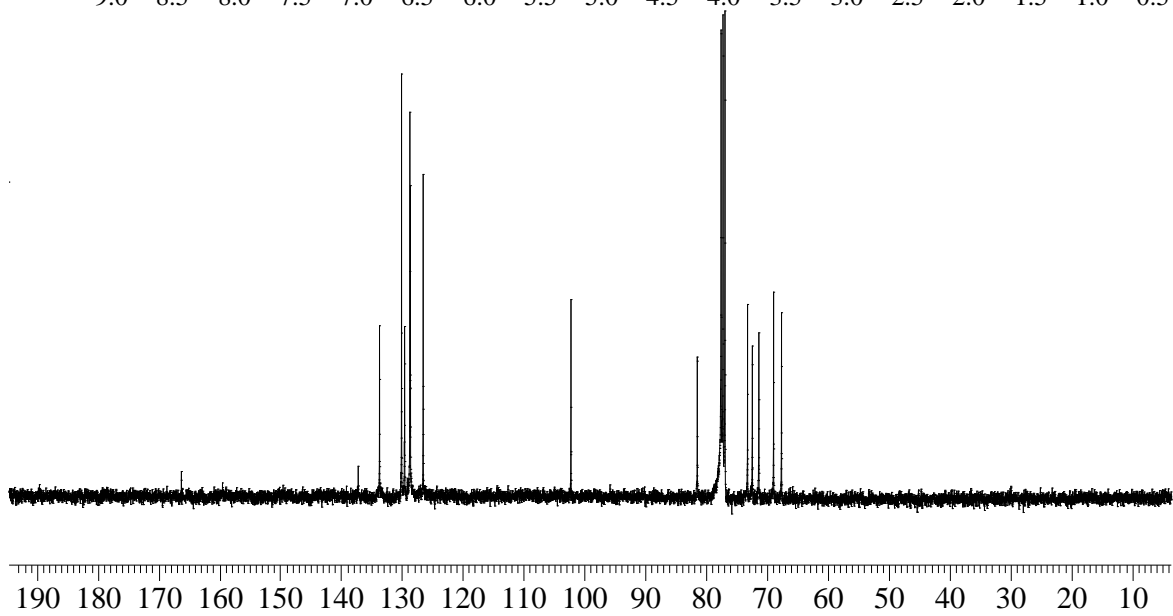

$^1\text{H}$  (400 MHz,  $\text{CDCl}_3$ ) and  $^{13}\text{C}$  NMR (100 MHz,  $\text{CDCl}_3$ ) spectra of compound **15B**.

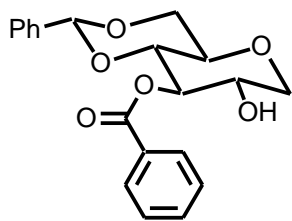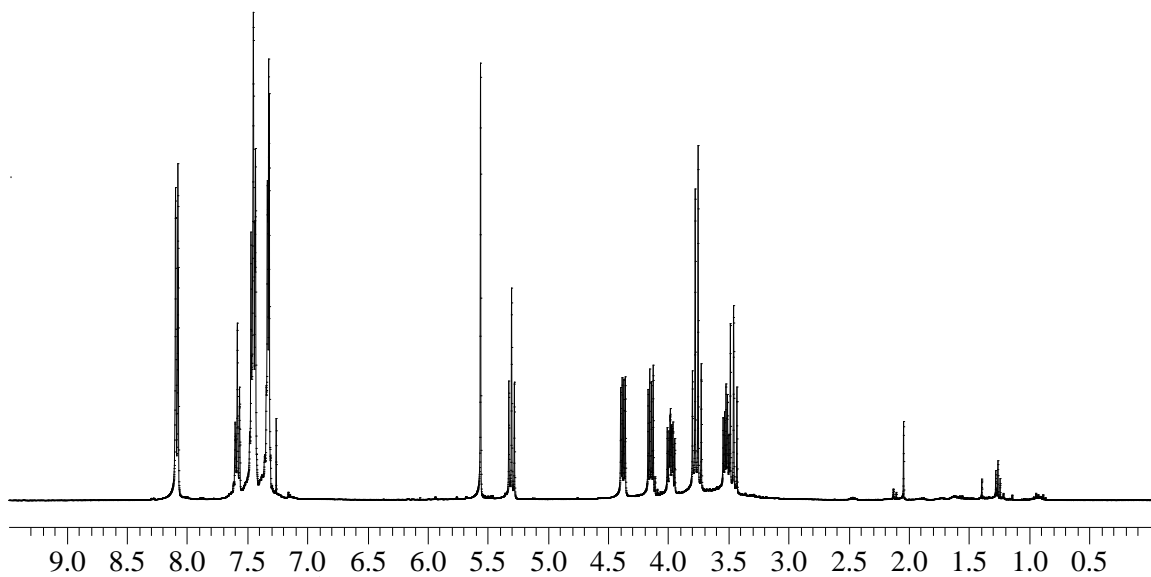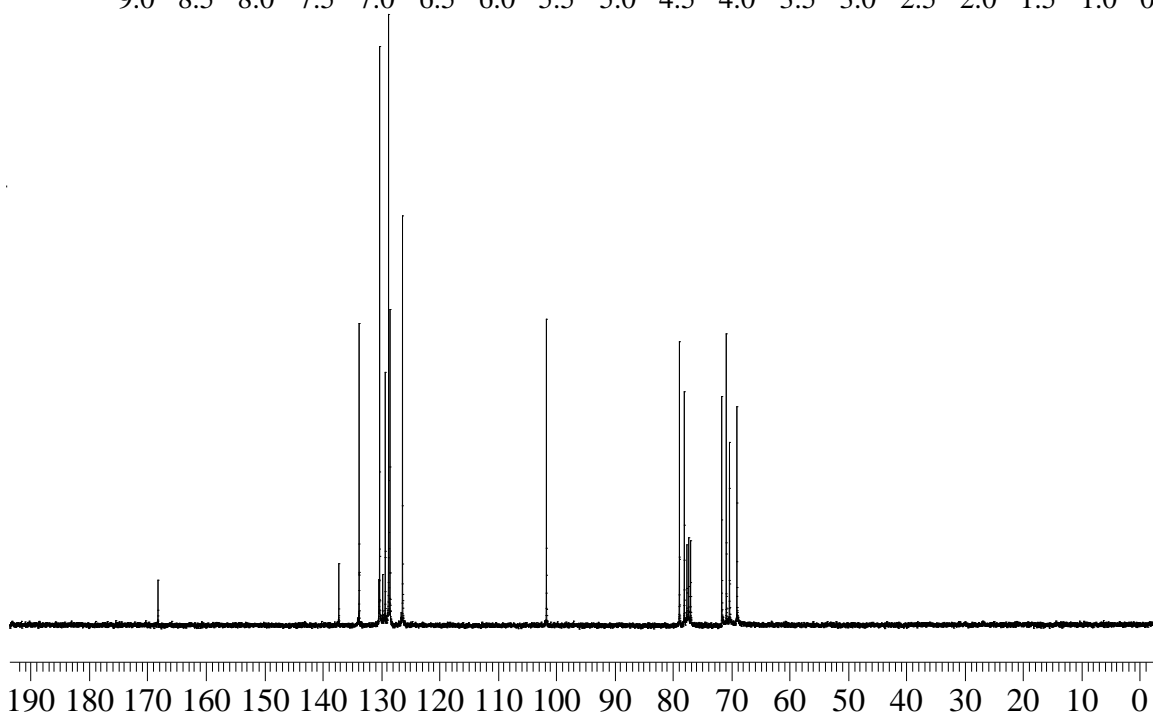

$^1\text{H}$  (400 MHz,  $\text{CDCl}_3$ ) and  $^{13}\text{C}$  NMR (100 MHz,  $\text{CDCl}_3$ ) spectra of compound 15C.

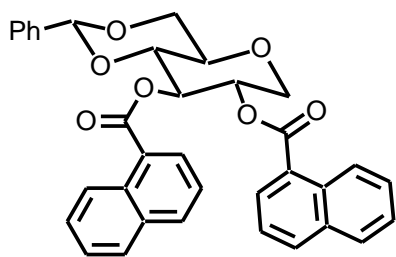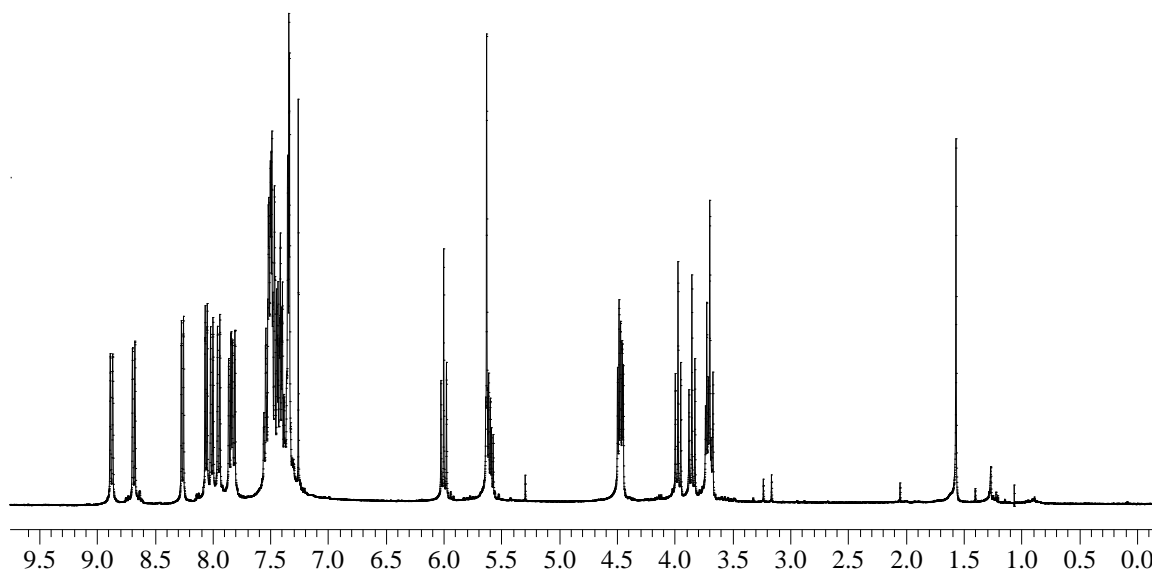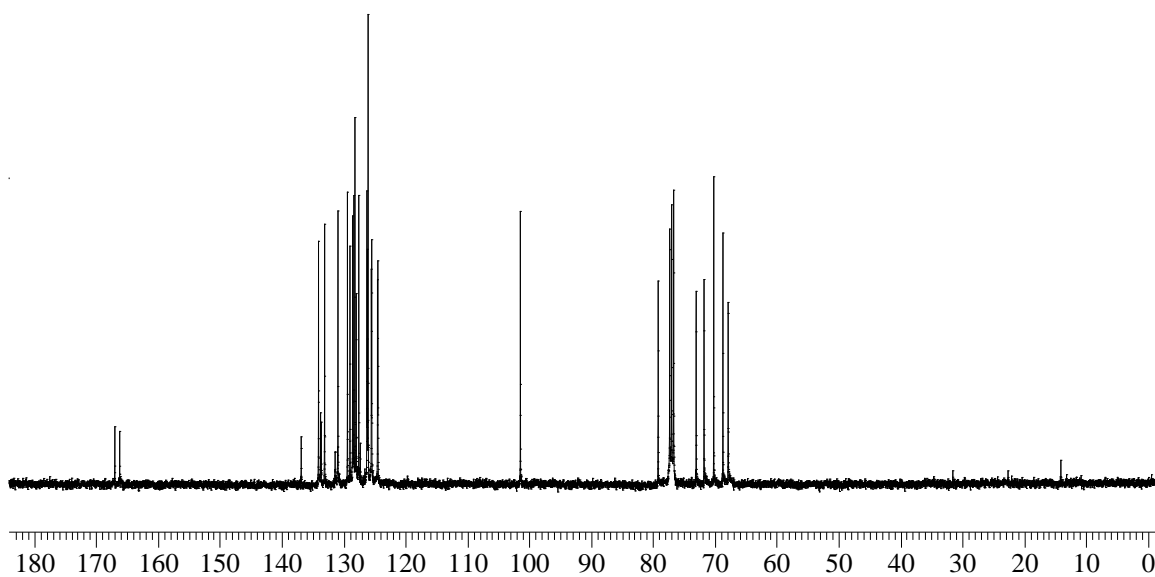

$^1\text{H}$  (400 MHz,  $\text{CDCl}_3$ ) and  $^{13}\text{C}$  NMR (100 MHz,  $\text{CDCl}_3$ ) spectra of compound **16A**.



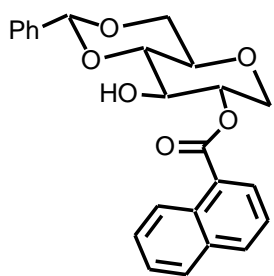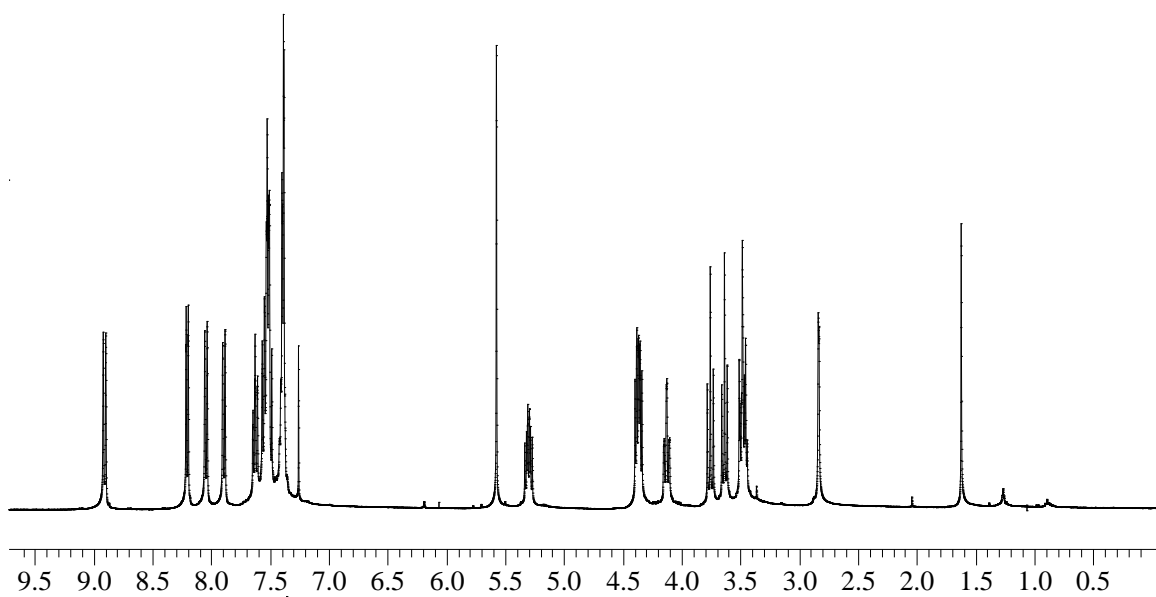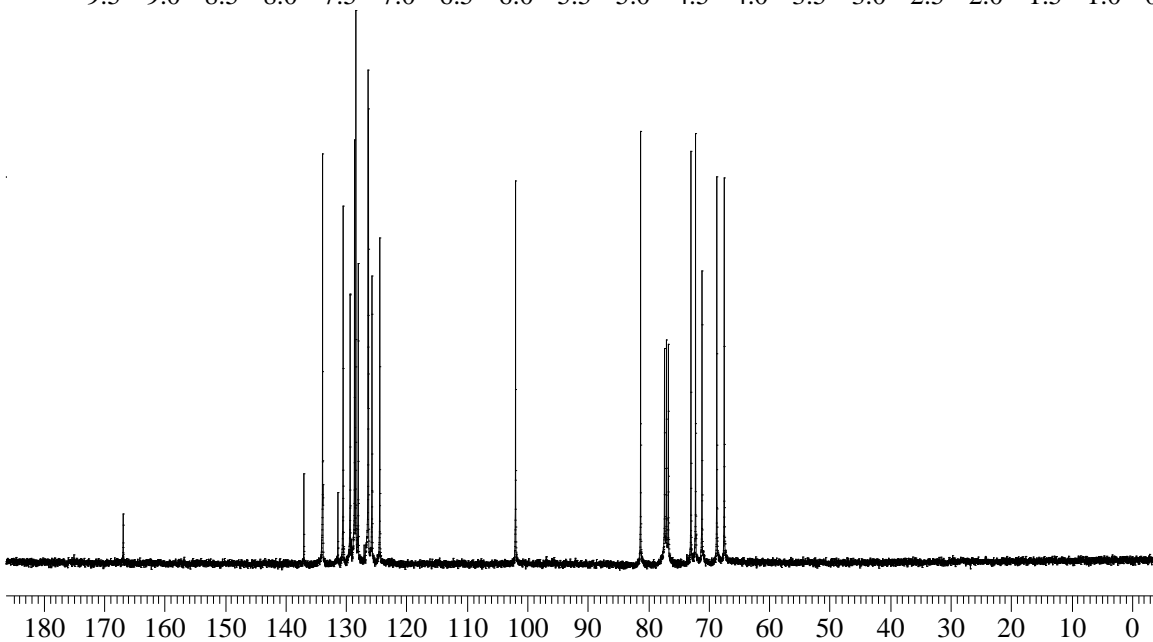

$^1\text{H}$  (400 MHz,  $\text{CDCl}_3$ ) and  $^{13}\text{C}$  NMR (100 MHz,  $\text{CDCl}_3$ ) spectra of compound **16B**.

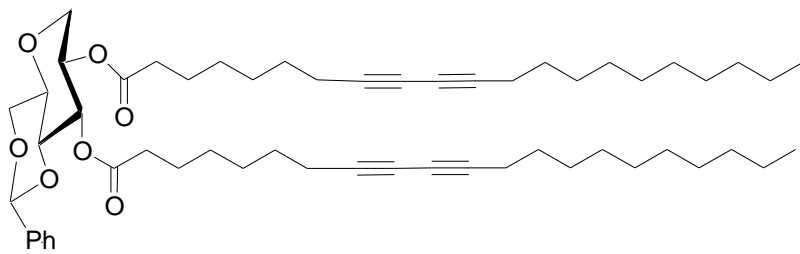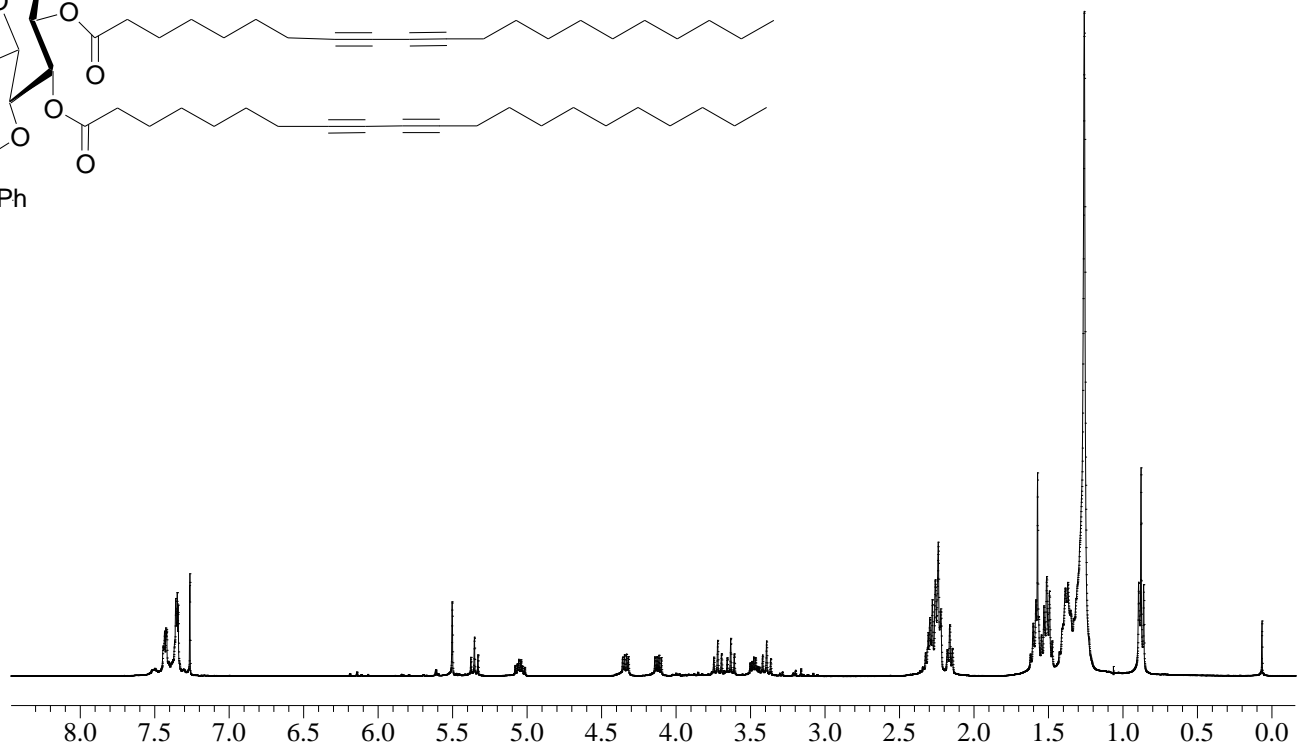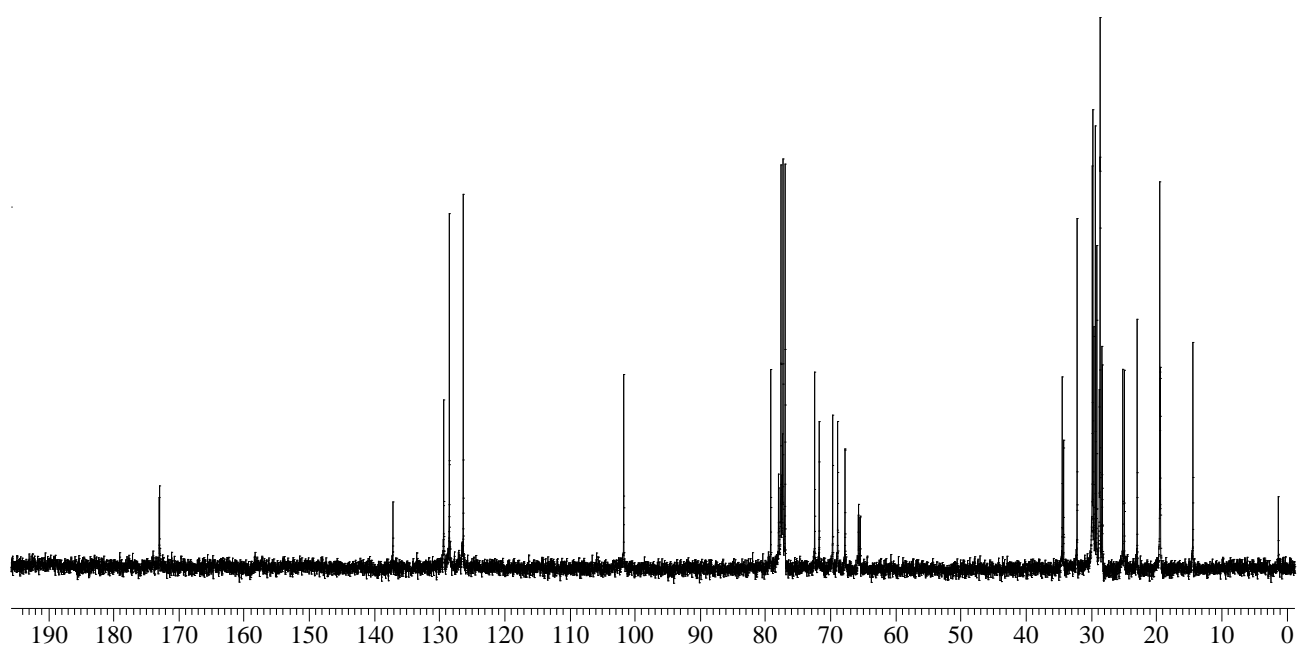

$^1\text{H}$  (400 MHz,  $\text{CDCl}_3$ ) and  $^{13}\text{C}$  NMR (100 MHz,  $\text{CDCl}_3$ ) spectra of compound **17A**.

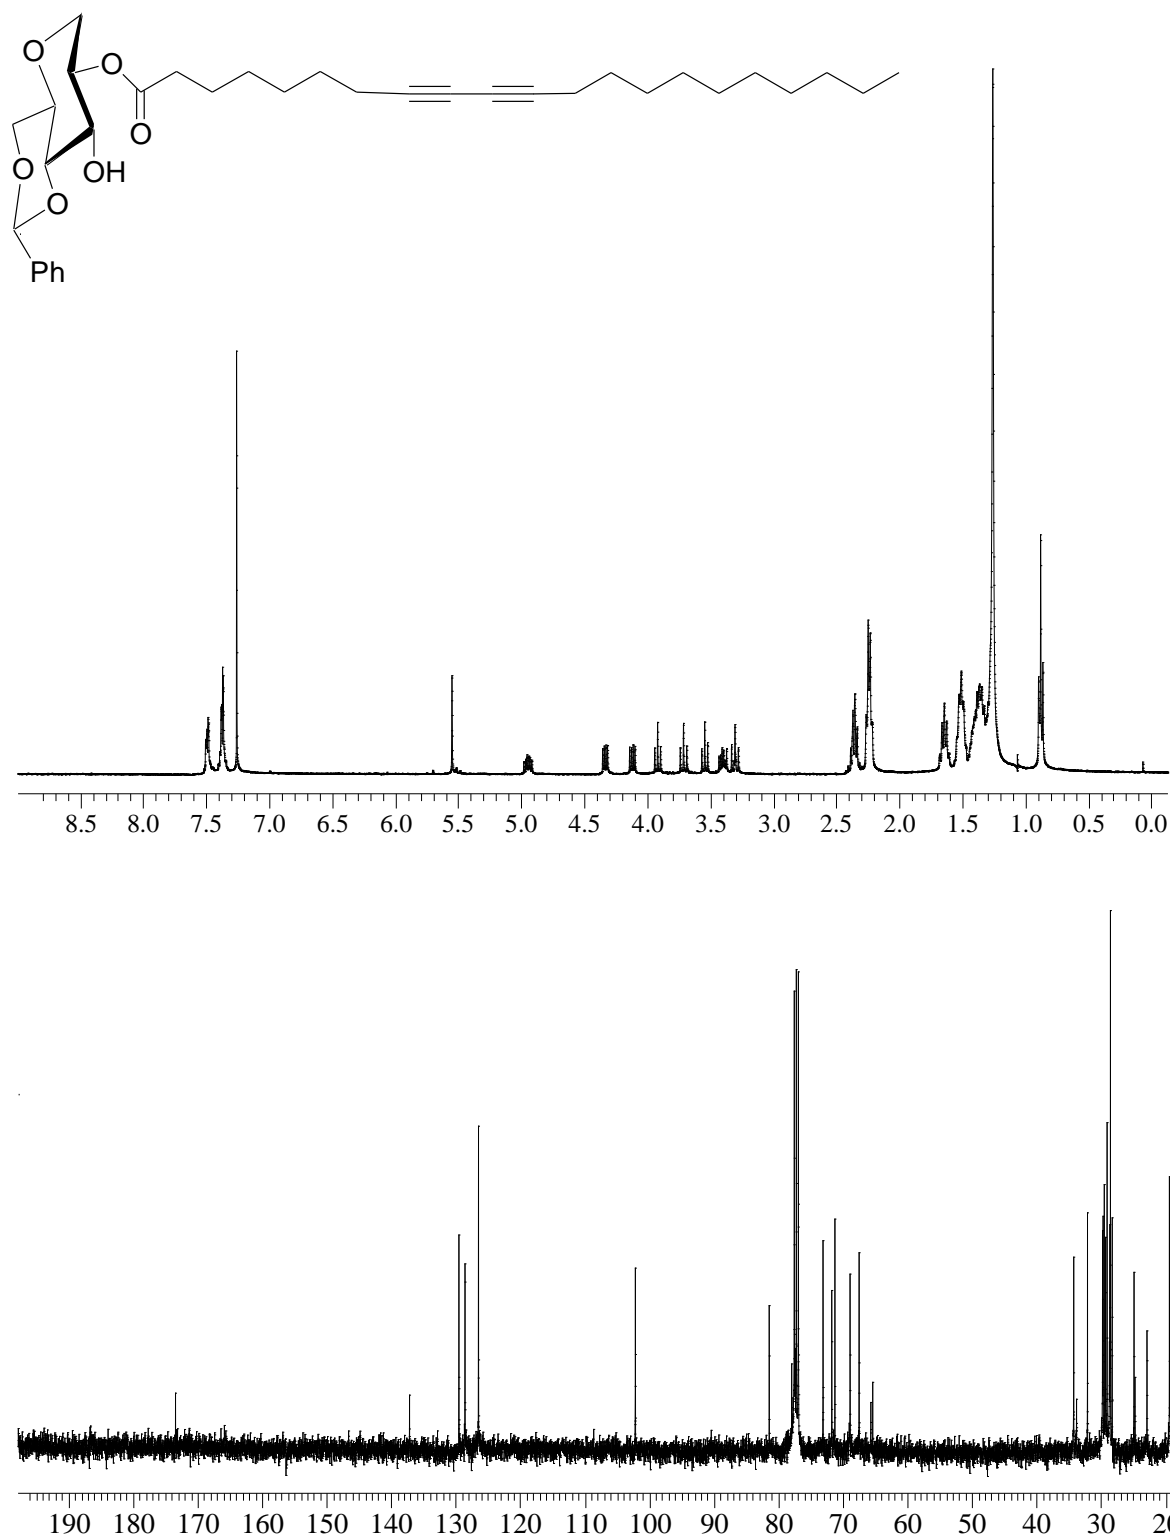

$^1\text{H}$  (400 MHz,  $\text{CDCl}_3$ ) and  $^{13}\text{C}$  NMR (100 MHz,  $\text{CDCl}_3$ ) spectra of compound **17B**.

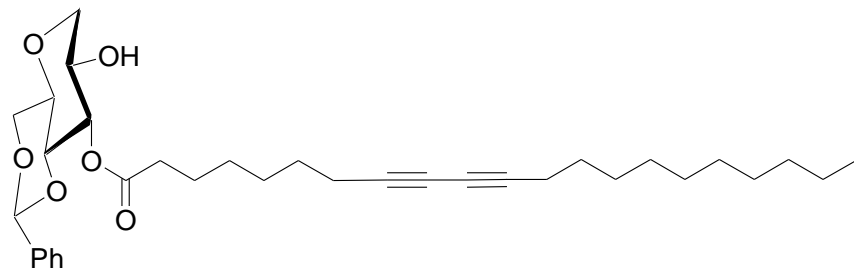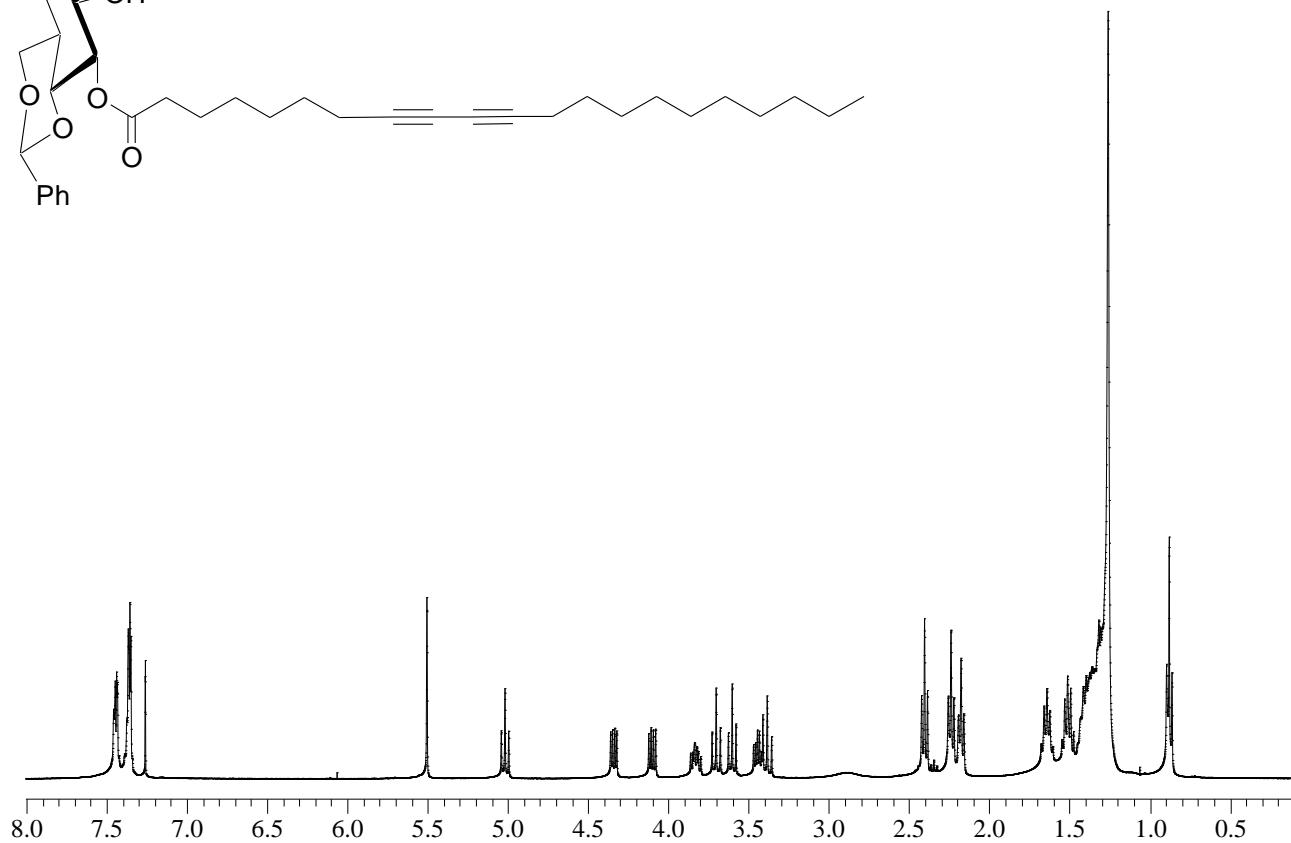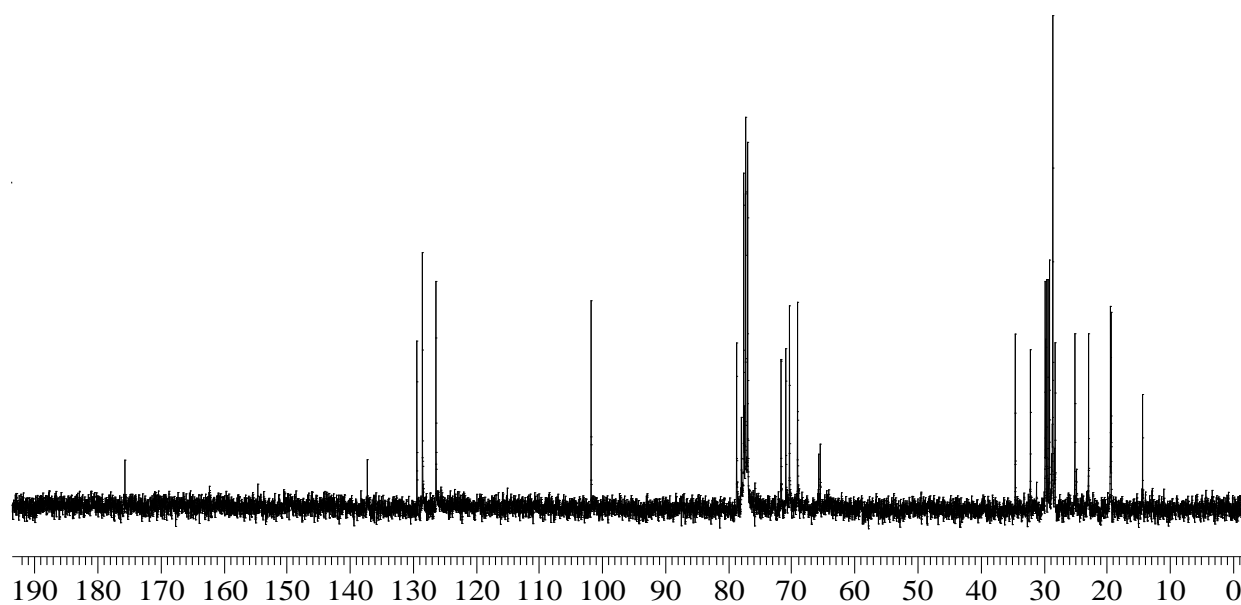

$^1\text{H}$  (400 MHz,  $\text{CDCl}_3$ ) and  $^{13}\text{C}$  NMR (100 MHz,  $\text{CDCl}_3$ ) spectra of compound **17C**.

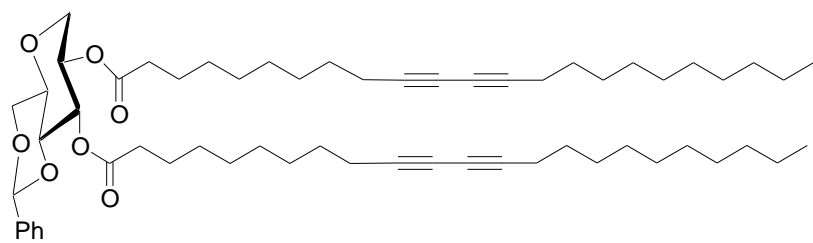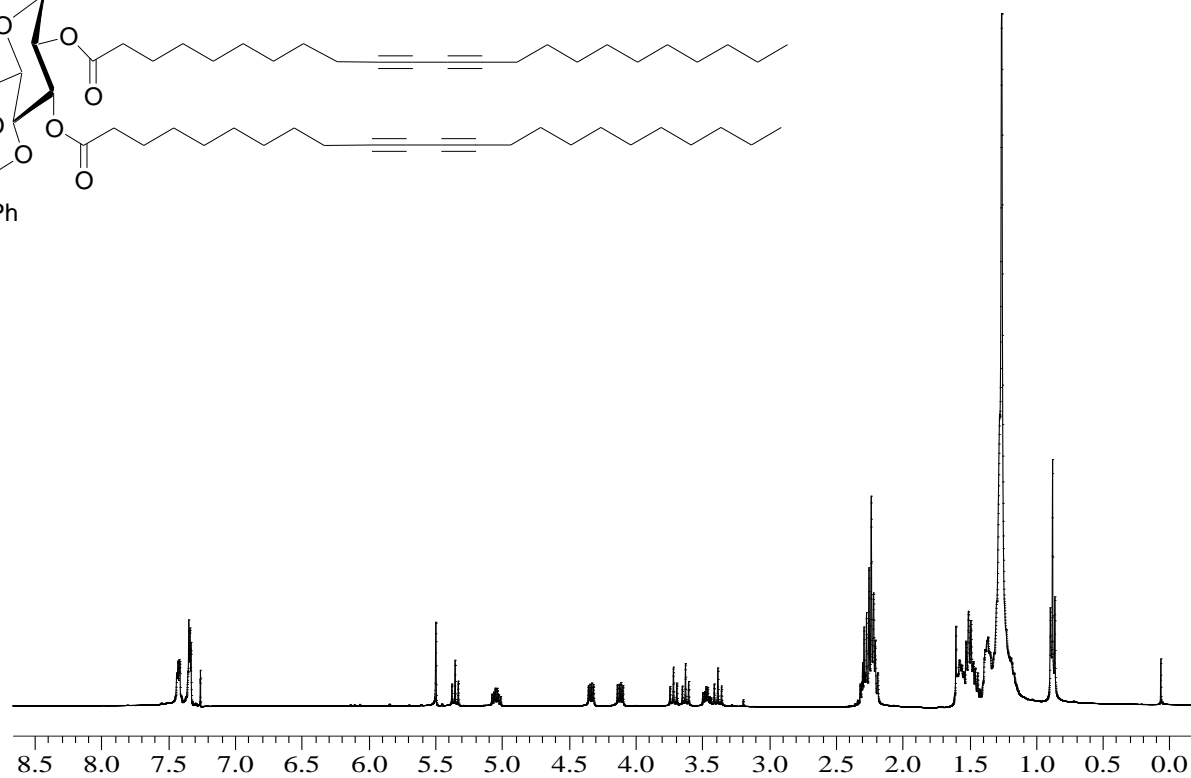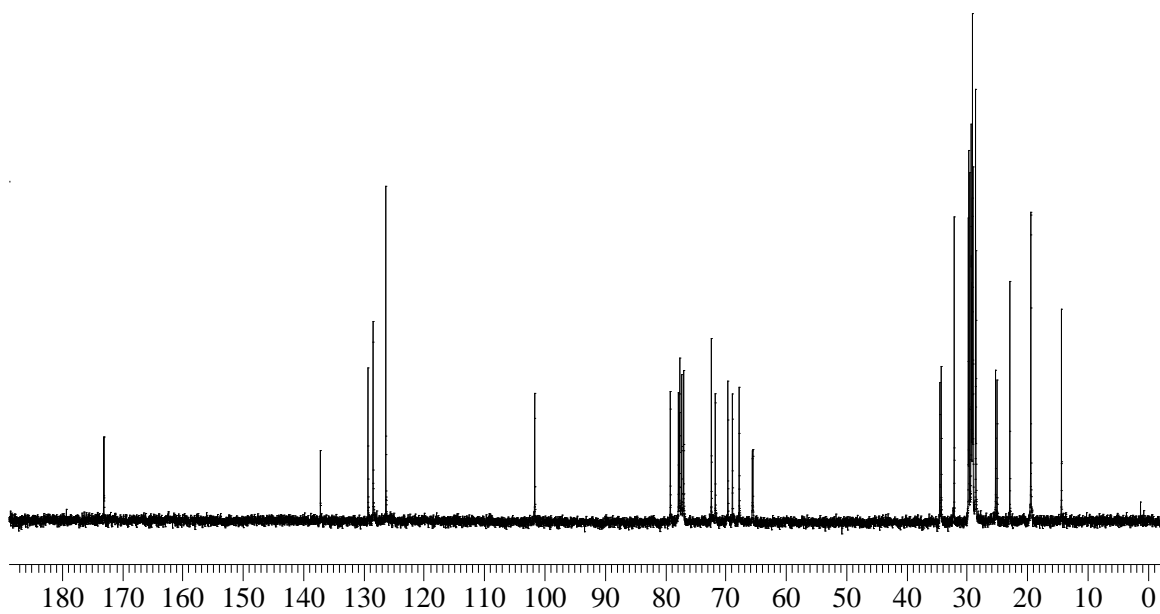

$^1\text{H}$  (400 MHz,  $\text{CDCl}_3$ ) and  $^{13}\text{C}$  NMR (100 MHz,  $\text{CDCl}_3$ ) spectra of compound **18A**.

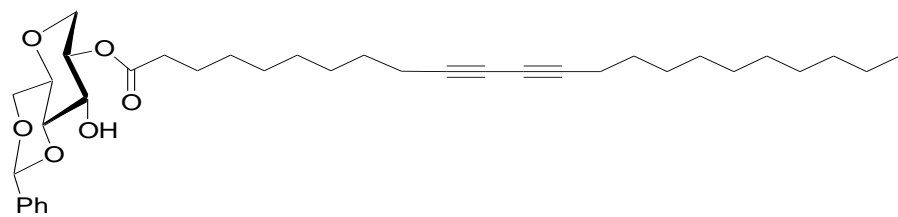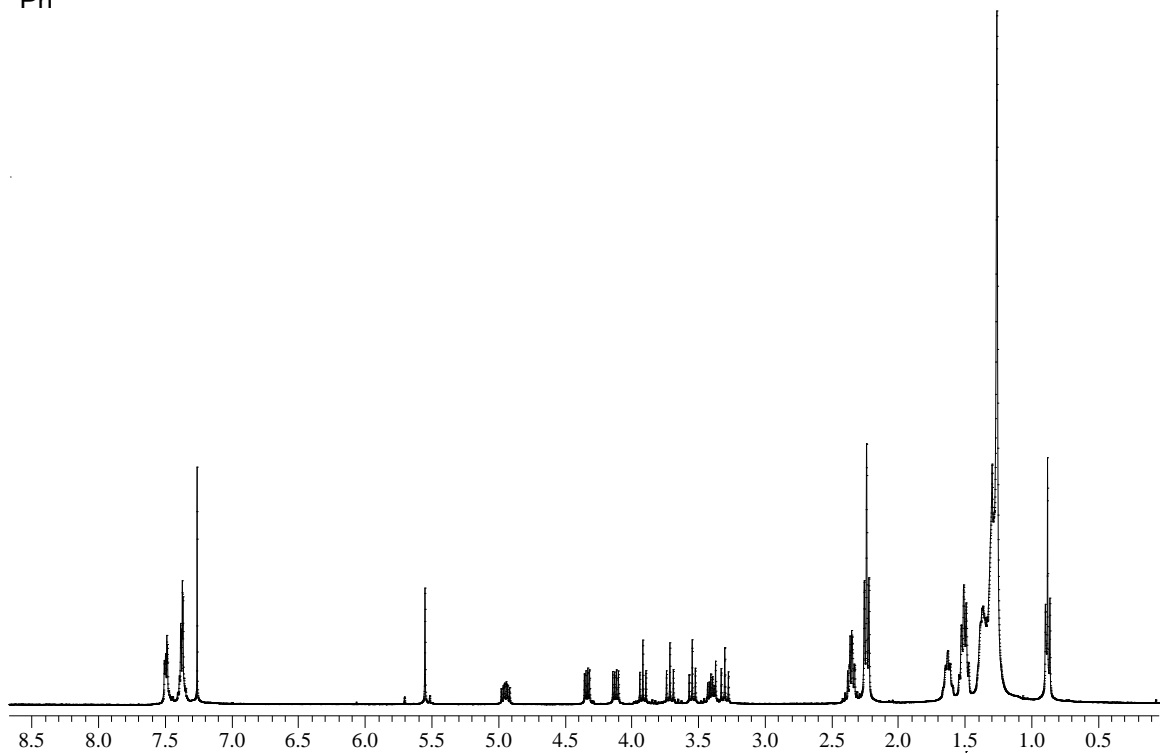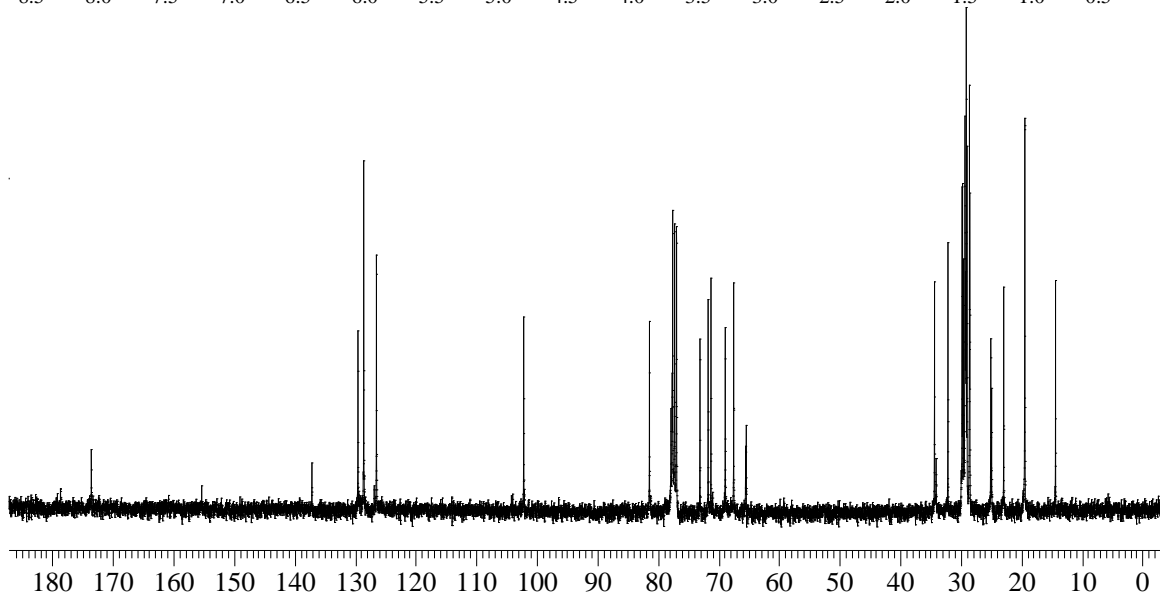

$^1\text{H}$  (400 MHz,  $\text{CDCl}_3$ ) and  $^{13}\text{C}$  NMR (100 MHz,  $\text{CDCl}_3$ ) spectra of compound **18B**.

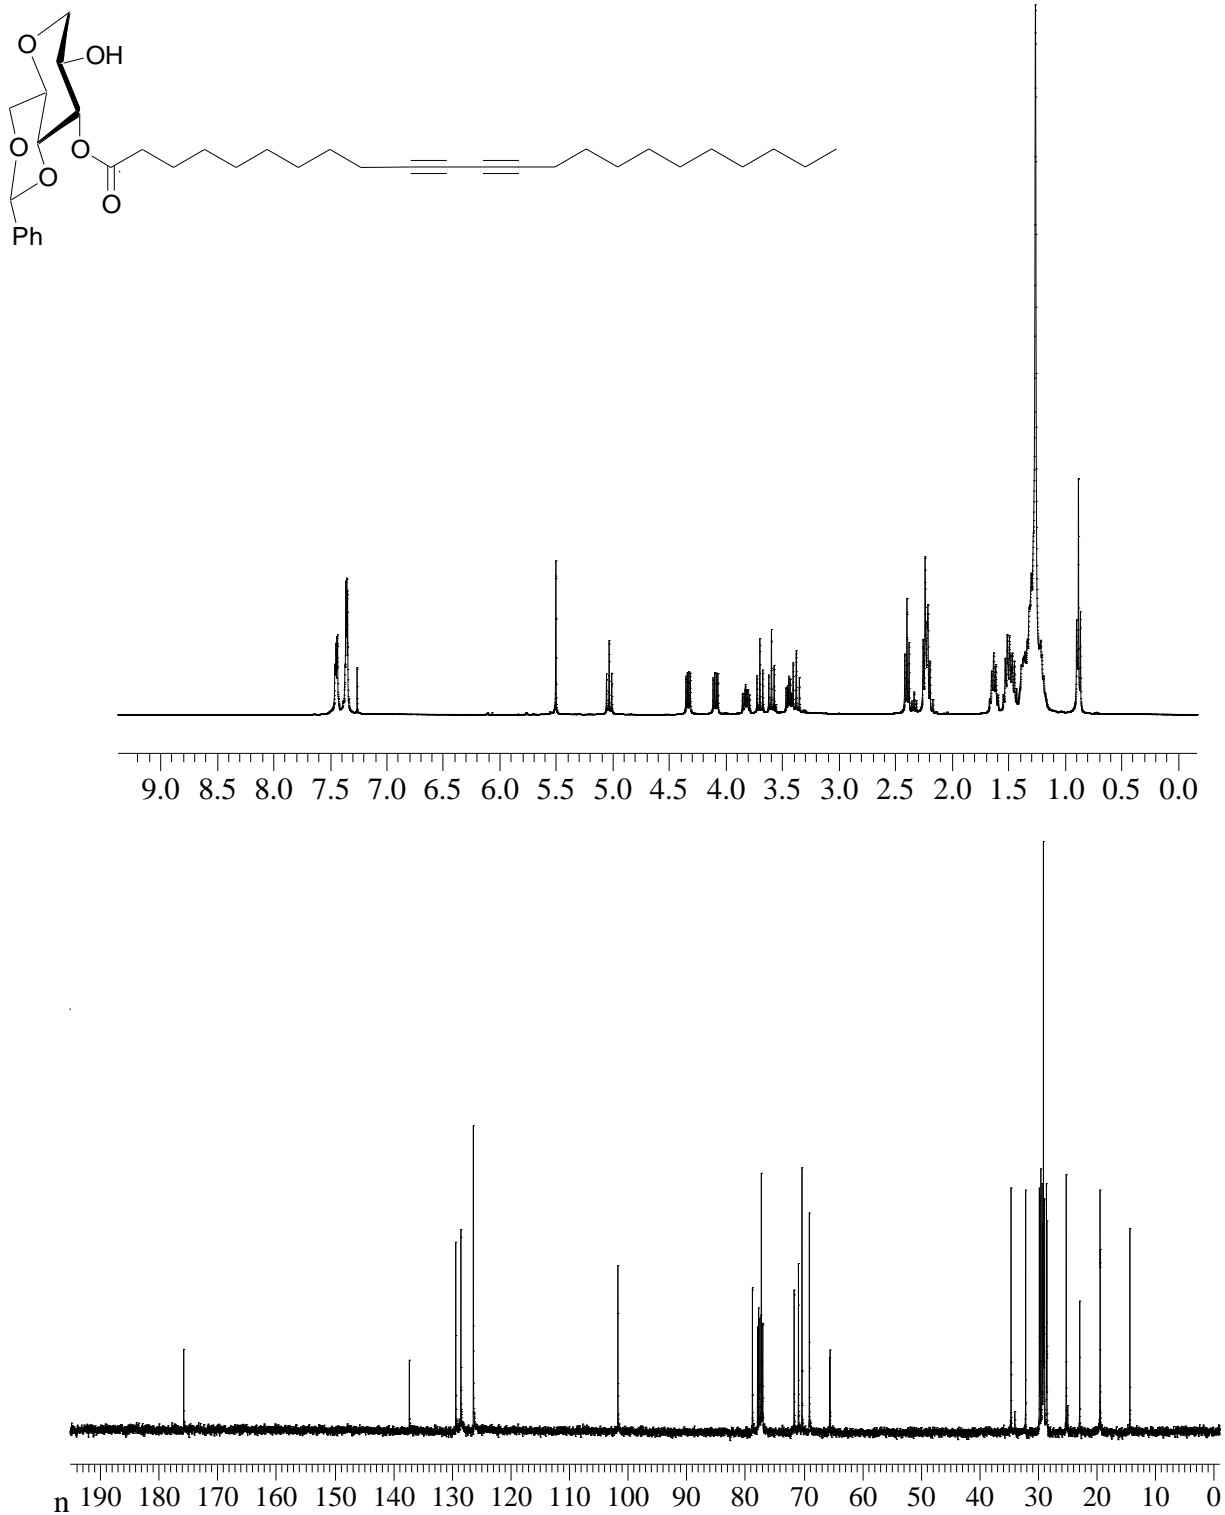

$^1\text{H}$  (400 MHz,  $\text{CDCl}_3$ ) and  $^{13}\text{C}$  NMR (100 MHz,  $\text{CDCl}_3$ ) spectra of compound **18C**.
